# Supplementary material
Source: PubMed Central journal article supplement (PMC2895961)
Supplement: NIHMS123176-supplement-1_si_001.pdf [file NIHMS123176-supplement-1_si_001.pdf]

*A One-Pot, 3-Component, Domino Heck-aza-Michael  
Approach to Libraries of Functionalized 1,1-Dioxido-  
1,2-benzisothiazoline-3-acetic acids*

*Alan Rolfe, Kyle Young, Kelly Volp, Frank Schoenen, Benjamin Neuenswander,*

*Gerald H. Lushington and Paul R. Hanson \**

<sup>a</sup>*Department of Chemistry, University of Kansas, 1251 Wescoe Hall Drive, Lawrence, KS 66045-7582*  
<sup>b</sup>*The Center for Chemical Methodologies and Library Development at the University of Kansas  
(KU-CMLD), 2121 Simons Drive, Structural Biology Center, West Campus, Lawrence, KS 66047, USA  
phanson@ku.edu*

**Table of contents**

|                                                                                                                             |        |
|-----------------------------------------------------------------------------------------------------------------------------|--------|
| General Experimental Methods                                                                                                | S2     |
| Experimental data for compounds <b>11, 14, 21</b> and <b>24</b>                                                             | S3     |
| Experimental data for compounds <b>28, 30</b> and <b>31</b>                                                                 | S4     |
| Experimental data for compounds <b>34, 44</b> and <b>47</b>                                                                 | S5     |
| Experimental data for compounds <b>53, 61</b> and <b>63</b>                                                                 | S6     |
| Experimental data for compounds <b>66, 68, 71</b> and <b>89</b>                                                             | S7     |
| Experimental data for compounds <b>90</b> and <b>91</b>                                                                     | S8     |
| Experimental data for compounds <b>92</b>                                                                                   | S9     |
| Table of Mass Spectroscopy Data for all Library Compounds                                                                   | S10-12 |
| <sup>1</sup> H NMR and <sup>13</sup> C NMR spectra                                                                          | S12-31 |
| Mass Directed Fractionation LC-Mz Spectra for Compounds<br><b>6, 12, 14, 24, 61, 62, 68, 85, 86, 89, 92</b> and <b>93</b> . | S32-44 |
| Lipinski and ADME Data                                                                                                      | S44-46 |
| References                                                                                                                  | S46-47 |

## Experimental Section

General procedures: All air and moisture sensitive reactions were carried out in flame- or oven-dried glassware under argon atmosphere using standard gas tight syringes, cannula, and septa. Stirring was achieved with oven-dried, magnetic stir bars. CH<sub>3</sub>CN was purified by passage through the Solv-Tek purification system employing activated Al<sub>2</sub>O<sub>3</sub> (Grubbs, R. H.; Rosen, R. K.; Timmers, F. J. *Organometallics* **1996**, *15*, 1518-1520). Et<sub>3</sub>N was purified by passage over basic alumina and stored over KOH. Flash column chromatography was performed with SiO<sub>2</sub> from Sorbent Technology (30930M-25, Silica Gel 60A, 40-63  $\mu$ m). Thin layer chromatography was performed on silica gel 60F254 plates (EM-5717, Merck). Deuterated solvents were purchased from Cambridge Isotope laboratories. <sup>1</sup>H and <sup>13</sup>C NMR spectra were recorded on a Bruker DRX-400 NMR spectrometer operating at 400 MHz and 100 MHz respectively; or a Bruker Avance operating at 500 MHz and 125 MHz respectively. High-resolution mass spectrometry (HRMS) and FAB spectra were obtained in one of two manners: (i) on a VG Instrument ZAB double-focusing mass spectrometer and (ii) on a LCT Premier Spectrometer (Micromass UK Limited) operating on ESI (MeOH). All library syntheses using block technology were performed using a 24-position Mettler-Toledo Bohdan MiniBlock XT under an argon atmosphere in oven-dried Autochem 17 x 100 mm round bottom tubes. Parallel evaporations were performed using a GeneVac EZ-2 plus evaporator. Automated preparative reverse-phase HPLC purification was performed using a Waters 2767 Mass-Directed Fractionation system (2767 sample manager, 2525 Binary Pump, 515 Make-up pump) with a Waters ZQ quadrupole spectrometer and detected by UV (270 nm, Waters Xterra MS C-18 column, 19x150 mm, elution with the appropriate gradient of CH<sub>3</sub>CN in pH 9.8 buffered aqueous ammonium formate at 18 mL min<sup>-1</sup> flow rate). Purity was determined by reverse-phase HPLC with peak area (UV) at 214 nm using a Waters Alliance 2795 system (Waters Xterra MS C-18 column, 4.6x150 mm, elution with a linear gradient of 5% CH<sub>3</sub>CN in pH 9.8 buffered aqueous ammonium formate to 100% CH<sub>3</sub>CN at 1.0 mL/min flow rate).

**2-(2-(4-Methoxybenzyl)-3-isothiazolin-1-yl)acetic acid 1,1'-dioxide (11):** Prepared using general procedure A. FTIR (neat) 1738, 1610, 1514, 1288, 1172  $\text{cm}^{-1}$ ;  $^1\text{H}$  NMR (500 MHz,  $\text{CDCl}_3$ )  $\delta$  7.84 – 7.80 (m, 1H), 7.61 – 7.51 (m, 2H), 7.39 (d,  $J = 7.8$  Hz, 1H), 7.34 (t,  $J = 5.8$  Hz, 2H), 6.87 – 6.80 (m, 2H), 4.80 – 4.74 (m, 1H), 4.58 (d,  $J = 15.3$  Hz, 1H), 4.42 (d,  $J = 15.3$  Hz, 1H), 3.77 (s, 3H), 2.92 (dd,  $J = 16.5, 5.0$  Hz, 1H), 2.72 (dd,  $J = 16.5, 7.0$  Hz, 1H);  $^{13}\text{C}$  NMR (126 MHz,  $\text{CDCl}_3$ )  $\delta$  174.6, 159.4, 137.2, 134.6, 130.0, 129.5, 126.8, 124.2, 121.3, 114.1, 56.4, 55.2, 46.0, 38.7; HRMS calculated for  $\text{C}_{17}\text{H}_{18}\text{NO}_5\text{S}$  ( $\text{M}+\text{H}$ ) $^+$  348.0906; found 348.0915 (TOF MS EI+).

**3-(2-Oxopropyl)-2-phenylthiazolin-1-one 1,1'-dioxide (14):** Prepared using general procedure A. FTIR (neat) 1714, 1496, 1301, 1170  $\text{cm}^{-1}$ ;  $^1\text{H}$  NMR (500 MHz,  $\text{CDCl}_3$ )  $\delta$  7.86 (d,  $J = 7.3$  Hz, 1H), 7.66 – 7.57 (m, 2H), 7.50 – 7.44 (m, 5H), 7.31 (dt,  $J = 12.0, 4.2$  Hz, 1H), 5.72 (dd,  $J = 8.7, 3.4$  Hz, 1H), 3.10 (dd,  $J = 18.2, 3.4$  Hz, 1H), 2.94 (dd,  $J = 18.2, 8.7$  Hz, 1H), 2.12 (s, 3H);  $^{13}\text{C}$  NMR (126 MHz,  $\text{CDCl}_3$ )  $\delta$  206.0, 137.0, 134.4, 133.2, 129.9, 129.6, 126.9, 124.5, 124.4, 121.4, 56.8, 47.4, 30.7; HRMS calculated for  $\text{C}_{16}\text{H}_{16}\text{NO}_3\text{S}$  ( $\text{M}+\text{H}$ ) $^+$  302.0851; found 302.0865 (TOF MS EI+).

**Methyl 2-(2-benzyl-6-fluoro-3-isothiazolin-1-yl)acetate 1,1'-dioxide (21):** Prepared using general procedure A. FTIR (neat) 1735, 1436, 1296, 1170  $\text{cm}^{-1}$ ;  $^1\text{H}$  NMR (500 MHz,  $\text{CDCl}_3$ )  $\delta$  7.83 (dd,  $J = 8.5, 4.7$  Hz, 1H), 7.41 (d,  $J = 7.8$  Hz, 2H), 7.38 – 7.30 (m, 4H), 7.08 (d,  $J = 8.3$  Hz, 1H), 4.83 – 4.74 (m, 1H), 4.59 (d,  $J = 15.6$  Hz, 1H), 4.49 (d,  $J = 15.6$  Hz, 1H), .3.62 (s, 3H), 2.87 (dd,  $J = 16.5, 5.0$  Hz 1H), 2.69 (dd,  $J = 16.5, 7.2$  Hz, 1H);  $^{13}\text{C}$  NMR (126 MHz,  $\text{CDCl}_3$ )  $\delta$  170.2, 166.2, 164.3, 140.4, 134.9, 130.8, 128.8, 127.7, 128.4, 128.2, 123.7, 117.5, 111.7, 56.5, 52.1, 46.7, 38.5; HRMS calculated for  $\text{C}_{17}\text{H}_{17}\text{FNO}_4\text{S}$  ( $\text{M}+\text{H}$ ) $^+$  350.0862; found 350.0870 (TOF MS EI+).

**Ethyl 2-(2-cyclopentyl-6-fluoro-3-isothiazolin-1-yl)acetate 1,1'-dioxide (24):** Prepared using general procedure A. FTIR (neat) 1730, 1595, 1475, 1299, 1171  $\text{cm}^{-1}$ ;  $^1\text{H}$  NMR (500 MHz,  $\text{CDCl}_3$ )  $\delta$  7.74 (dd,  $J = 8.5, 4.8$  Hz, 1H), 7.21 (td,  $J = 8.5, 2.2$  Hz, 1H), 7.14 (dd,  $J = 8.4, 2.2$  Hz 1H), 4.94 (dd,  $J = 9.0, 3.7$  Hz 1H), 4.23 – 4.12 (m, 2H), 3.91 – 3.79 (m, 1H), 3.07 (dd,  $J = 16.5, 3.8$  Hz, 1H), 2.75 (dd,  $J =$

16.5, 9.1 Hz, 1H), 2.06 (ddd,  $J = 11.1, 7.2, 3.1$  Hz, 2H), 1.94 – 1.71 (m, 4H), 1.67 – 1.55 (m, 3H), 1.24 (t,  $J = 7.2$  Hz, 3H);  $^{13}\text{C}$  NMR (126 MHz,  $\text{CDCl}_3$ )  $\delta$  170.3, 166.1, 141.2, 131.7, 123.4, 117.4, 117.2, 111.8, 111.60, 61.2, 57.3, 56.3, 39.6, 30.8, 29.1, 23.3, 22.6, 14.0; HRMS calculated for  $\text{C}_{16}\text{H}_{22}\text{FNO}_4\text{S}$  ( $\text{M}+\text{H}$ ) $^+$  342.1175; found 342.1182 (TOF MS EI+).

**Ethyl 2-(6-fluoro-2-(4-methoxybenzyl)-3-isothiazolin-1-yl)acetate 1,1'-dioxide (28):** Prepared using general procedure A. FTIR (neat) 1730, 1514, 1298, 1171  $\text{cm}^{-1}$ ;  $^1\text{H}$  NMR (500 MHz,  $\text{CDCl}_3$ )  $\delta$  7.81 (dd,  $J = 8.6, 4.8$  Hz, 1H), 7.34 (d,  $J = 8.7$  Hz, 2H), 7.23 (dt,  $J = 8.5, 2.2$  Hz, 1H), 7.08 (dd,  $J = 8.4, 2.2$  Hz, 1H), 6.91 – 6.84 (m, 2H), 4.75 (dd,  $J = 7.2, 4.8$  Hz, 1H), 4.57 (d,  $J = 15.3$  Hz, 1H), 4.39 (d,  $J = 15.3$  Hz, 1H), 4.16 – 4.01 (m, 2H), 3.80 (s, 3H), 2.87 (dd,  $J = 16.4, 4.8$  Hz, 1H), 2.68 (dd,  $J = 16.4, 7.3$  Hz, 1H), 1.18 (t,  $J = 7.2$  Hz, 3H).  $^{13}\text{C}$  NMR (126 MHz,  $\text{CDCl}_3$ )  $\delta$  169.8, 166.2, 164.1, 159.4, 140.5, 130.9, 129.9, 126.6, 123.6, 117.4, 114.1, 111.7, 61.2, 56.1, 55.2, 46.0, 38.6, 13.9; HRMS calculated for  $\text{C}_{19}\text{H}_{21}\text{FNO}_5\text{S}$  ( $\text{M}+\text{H}$ ) $^+$  394.1124; found 394.1134 (TOF MS EI+).

**Ethyl 2-(6-fluoro-2-octyl-3-isothiazolin-1-yl)acetate 1,1'-dioxide (30):** Prepared using general procedure A. FTIR (neat) 1733, 1593, 1299, 1172  $\text{cm}^{-1}$ ;  $^1\text{H}$  NMR (500 MHz,  $\text{CDCl}_3$ )  $\delta$  7.78 (dd,  $J = 8.5, 4.5$  Hz, 1H), 7.24 (m, 1H), 7.14 (d,  $J = 8.4$  Hz, 1H), 4.93 – 4.82 (m, 1H), 4.20 (q,  $J = 7.1$  Hz, 2H), 3.30 (t,  $J = 7.6$  Hz, 2H), 2.98 (dd,  $J = 16.5, 5.0$  Hz, 1H), 2.75 (dd,  $J = 16.5, 7.3$  Hz, 1H), 1.72 (d,  $J = 7.0$  Hz, 2H), 1.28 (m, 13H), 0.87 (t,  $J = 6.3$  Hz, 3H);  $^{13}\text{C}$  NMR (126 MHz,  $\text{CDCl}_3$ )  $\delta$  170.2, 166.4, 162.4, 140.6, 131.0, 117.5, 117.3, 111.7, 61.4, 57.1, 43.6, 38.9, 31.7, 29.1, 28.0, 26.8, 22.6, 14.0; HRMS calculated for  $\text{C}_{19}\text{H}_{29}\text{FNO}_4\text{S}$  ( $\text{M}+\text{H}$ ) $^+$  386.1801; found 386.1811 (TOF MS EI+).

**2-(2-Cyclopentyl-6-fluoro-3-isothiazolin-1-yl)acetic acid 1,1'-dioxide (31):** Prepared using general procedure A. FTIR (neat) 1731, 1593, 1294, 1170  $\text{cm}^{-1}$ ;  $^1\text{H}$  NMR (500 MHz,  $\text{CDCl}_3$ )  $\delta$  7.76 (dd,  $J = 8.5, 4.8$  Hz, 1H), 7.23 (td,  $J = 8.5, 2.2$  Hz, 1H), 7.18 (dd,  $J = 8.3, 2.2$  Hz, 1H), 4.94 (dd,  $J = 9.0, 3.5$  Hz, 1H), 3.93 – 3.80 (m, 1H), 3.16 (dd,  $J = 16.8, 3.6$  Hz, 1H), 2.83 (dd,  $J = 16.8, 9.0$  Hz, 1H), 2.15 – 2.01 (m, 2H), 1.91 – 1.74 (m, 5H), 1.63 (dd,  $J = 6.7, 4.9$  Hz, 2H);  $^{13}\text{C}$  NMR (126 MHz,  $\text{CDCl}_3$ )  $\delta$  174.9, 166.2,

164.2, 141.0, 131.7, 123.6, 117.6, 117.4, 111.8, 111.6, 57.5, 56.0, 39.3, 30.8, 29.1, 23.3, 22.7; HRMS calculated for  $C_{14}H_{17}FNO_4S$  (M+H)<sup>+</sup> 314.0862; found 314.0872 (TOF MS EI+).

**2-(6-Fluoro-2-(4-methoxybenzyl)-3-isothiazolin-1-yl)acetic acid 1,1'-dioxide (34):** Prepared using general procedure A. FTIR (neat) 1718, 1612, 1514, 1292, 1174  $cm^{-1}$ ;  $^1H$  NMR (500 MHz,  $CDCl_3$ )  $\delta$  7.82 (dd,  $J = 8.5, 4.6$  Hz, 1H), 7.33 (d,  $J = 8.1$  Hz, 2H), 7.27 – 7.21 (m, 1H), 7.10 (d,  $J = 8.2$  Hz, 1H), 6.86 (d,  $J = 8.2$  Hz, 2H), 4.76 – 4.70 (m, 1H), 4.57 (d,  $J = 15.3$  Hz, 1H), 4.40 (d,  $J = 15.2$  Hz, 1H), 3.78 (s, 3H), 3.54 (s, 1H), 2.93 (dd,  $J = 16.7, 4.6$  Hz, 1H), 2.72 (dd,  $J = 16.7, 7.3$  Hz, 1H);  $^{13}C$  NMR (126 MHz,  $CDCl_3$ )  $\delta$  174.46, 165.2, 159.52, 140.3, 130.8, 130.0, 126.4, 123.8, 117.6, 117.4, 114.2, 111.8, 111.6, 55.9, 55.2, 46.2, 38.3; HRMS calculated for  $C_{17}H_{17}FNO_5S$  (M+H)<sup>+</sup> 366.0811; found 366.0819 (TOF MS EI+).

**Ethyl 2-(2-isopropyl-3-oxo-5-(trifluoromethyl) isothiazolin-1-yl)ethanoate 1,1'-dioxide (44):** Prepared using general procedure A. FTIR (neat) 1731, 1328, 1161  $cm^{-1}$ ;  $^1H$  NMR (500 MHz,  $CDCl_3$ )  $\delta$  8.02 (s, 1H), 7.82 (d,  $J = 8.2$  Hz, 1H), 7.62 (d,  $J = 7.8$  Hz, 1H), 5.08 (dd,  $J = 8.1, 4.4$  Hz, 1H), 4.19 (q,  $J = 7.1$  Hz, 2H), 4.06 (dt,  $J = 13.6, 6.8$  Hz, 1H), 3.05 (dd,  $J = 16.6, 4.4$  Hz, 1H), 2.83 (dd,  $J = 16.6, 8.1$  Hz, 1H), 1.40 (d,  $J = 6.8$  Hz, 3H), 1.35 (d,  $J = 6.8$  Hz, 3H), 1.24 (t,  $J = 7.1$  Hz, 3H);  $^{13}C$  NMR (126 MHz,  $CDCl_3$ )  $\delta$  168.2, 137.7, 127.6, 123.2, 116.6 (d,  $J_{C-F} = 3.9$  Hz), 59.3, 52.5, 46.9, 38.9, 19.6, 17.5, 12.0; HRMS calculated for  $C_{15}H_{19}F_3NO_4S$  (M+H)<sup>+</sup> 366.0987; found 366.0987 (TOF MS EI+).

**Ethyl 2-(2-(4-methoxyphenyl)-5-(trifluoromethyl)isothiazolin-1-yl)ethanoate 1,1'-dioxide (47):** Prepared using general procedure A. FTIR (neat) 1733, 1602, 1326, 1166  $cm^{-1}$ ;  $^1H$  NMR (500 MHz,  $CDCl_3$ )  $\delta$  8.15 (s, 1H), 7.92 (d,  $J = 8.2$  Hz, 1H), 7.72 (d,  $J = 7.8$  Hz, 1H), 7.38 (t,  $J = 8.2$  Hz, 1H), 7.09 – 7.05 (m, 1H), 7.03 (t,  $J = 2.2$  Hz, 1H), 6.93 – 6.89 (m, 1H), 5.59 (dd,  $J = 8.1, 4.0$  Hz, 1H), 4.10 (q,  $J = 7.1$  Hz, 2H), 3.84 (s, 3H), 3.01 (dd,  $J = 16.6, 4.1$  Hz, 1H), 2.81 (d,  $J = 8.2, 4.1$  Hz, 1H), 1.18 (t,  $J = 7.2$  Hz, 3H);  $^{13}C$  NMR (126 MHz,  $CDCl_3$ )  $\delta$  167.8, 158.7, 133.6, 132.6, 128.4 (d,  $J_{C-F} = 2.6$  Hz), 128.0, 123.3, 117.2, 111.5, 109.4, 59.4, 56.2, 53.4, 36.3, 11.9; HRMS calculated for  $C_{19}H_{18}F_3NO_5SNa$  (M+Na)<sup>+</sup>

452.0756; found 452.0757 (TOF MS EI+).

**2-(2-Cyclohexyl-3-oxo-6-(trifluoromethyl)isothiazolin-1-yl)acetic acid 1,1'-dioxide (53):** Prepared using general procedure A. FTIR (neat) 2935, 1712, 1610, 1512, 1299  $\text{cm}^{-1}$ ;  $^1\text{H}$  NMR (500 MHz,  $\text{CDCl}_3$ )  $\delta$  7.89 (d,  $J = 8.1$  Hz, 1H), 7.85 – 7.74 (m, 2H), 5.11 (dd,  $J = 8.1, 4.1$  Hz, 1H), 3.64 (tt,  $J = 12.0, 3.5$  Hz, 1H), 3.14 (dd,  $J = 16.9, 4.2$  Hz, 1H), 2.92 (dd,  $J = 16.9, 8.2$  Hz, 1H), 2.04 (d,  $J = 12.3$  Hz, 1H), 1.93 (d,  $J = 12.1$  Hz, 1H), 1.85 (t,  $J = 14.6$  Hz, 2H), 1.72 – 1.56 (m, 4H), 1.41 – 1.28 (m, 2H), 1.16 (ddd,  $J = 16.7, 13.1, 9.5$  Hz, 1H);  $^{13}\text{C}$  NMR (126 MHz,  $\text{CDCl}_3$ )  $\delta$  175.1, 139.7, 139.2, 134.74 (q,  $J_{\text{C-F}} = 33.1$  Hz), 126.8, 121.8, 56.9, 54.2, 40.5, 32.0, 29.9, 25.9, 25.7, 25.2; HRMS calculated for  $\text{C}_{16}\text{H}_{22}\text{F}_3\text{N}_2\text{O}_4\text{S}$  ( $\text{M}+\text{NH}_4$ ) $^+$  395.1252; found 395.1270 (TOF MS EI+).

**Ethyl 2-(3-oxo-2-(3-(trifluoromethyl)benzyl)isothiazolin-1-yl)acetate 1,1'-dioxide (61):** Prepared using general procedure B. FTIR (neat) 1731, 1328, 1298, 1172  $\text{cm}^{-1}$ ;  $^1\text{H}$  NMR (500 MHz,  $\text{CDCl}_3$ )  $\delta$  7.85 (d,  $J = 7.1$  Hz, 1H), 7.68 (d,  $J = 1.3$  Hz, 2H), 7.62 (dq,  $J = 7.5, 1.3$  Hz, 1H), 7.58 (dd,  $J = 11.9, 4.4$  Hz, 1H), 7.50 – 7.45 (m, 2H), 7.41 – 7.37 (m, 1H), 4.87 (t,  $J = 5.9$  Hz, 1H), 4.68 – 4.59 (s, 2H), 4.10 – 3.96 (m, 2H), 2.85 (dd,  $J = 16.5, 6.1$  Hz, 1H), 2.75 (dd,  $J = 16.5, 5.8$  Hz, 1H), 1.14 (t,  $J = 7.2$  Hz, 3H);  $^{13}\text{C}$  NMR (126 MHz,  $\text{CDCl}_3$ )  $\delta$  170.0, 137.0, 136.9, 134.4, 133.1, 131.7, 129.6, 129.3, 124.9 (q,  $J_{\text{C-F}} = 3.8$ ), 124.1, 121.4, 61.2, 57.7, 46.7, 39.5, 13.8; HRMS calculated for  $\text{C}_{19}\text{H}_{19}\text{F}_3\text{NO}_4\text{S}$  ( $\text{M}+\text{H}$ ) $^+$  414.0987; found 414.1001 (TOF MS EI+).

**Methyl 2-(2-(4-(dimethylamino)phenyl)-6-fluoro-3-isothiazolin-1-yl)acetate 1,1'-dioxide (63):** Prepared using general procedure B. FTIR (neat) 1737, 1608, 1519, 1299, 1172  $\text{cm}^{-1}$ ;  $^1\text{H}$  NMR (500 MHz,  $\text{CDCl}_3$ )  $\delta$  7.86 (dd,  $J = 8.6, 4.8$  Hz, 1H), 7.35 – 7.31 (m, 2H), 7.31 – 7.27 (m, 1H), 7.21 (dd,  $J = 8.5, 2.1$  Hz, 1H), 6.77 – 6.72 (m, 2H), 5.29 (dd,  $J = 7.9, 4.5$  Hz, 1H), 3.61 (s, 3H), 2.99 (s, 6H), 2.94 (dd,  $J = 16.5, 4.5$  Hz, 1H), 2.75 (dd,  $J = 16.5, 8.0$  Hz, 1H);  $^{13}\text{C}$  NMR (126 MHz,  $\text{CDCl}_3$ )  $\delta$  170.6, 166.2, 164.1, 150.7, 139.8, 130.1, 124.0, 120.4, 117.6, 117.4, 112.8, 111.7, 111.5, 59.2, 40.4, 38.3; HRMS calculated for  $\text{C}_{18}\text{H}_{20}\text{FN}_2\text{O}_4\text{S}$  ( $\text{M}+\text{H}$ ) $^+$  379.1128; found 379.1143 (TOF MS EI+).

**Methyl 2-(6-fluoro-2-(2-methoxybenzyl)-3-isothiazolin-1-yl)acetate 1,1'-dioxide (66):** Prepared using general procedure **B**. FTIR (neat) 1733, 1519, 1292, 1244  $\text{cm}^{-1}$ ;  $^1\text{H}$  NMR (500 MHz,  $\text{CDCl}_3$ )  $\delta$  7.80 (dd,  $J = 8.6, 4.8$  Hz, 1H), 7.49 – 7.45 (m, 1H), 7.33 – 7.27 (m, 1H), 7.23 (td,  $J = 8.5, 2.2$  Hz, 1H), 7.11 (dd,  $J = 8.5, 2.1$  Hz, 1H), 6.96 (t,  $J = 7.1$  Hz, 1H), 6.90 (d,  $J = 8.2$  Hz, 1H), 4.83 (dd,  $J = 8.6, 3.7$  Hz, 1H), 4.63 (d,  $J = 15.6$  Hz, 1H), 4.50 (d,  $J = 15.6$  Hz, 1H), 3.85 (s, 3H), 3.66 (s, 3H), 3.09 (dd,  $J = 16.6, 3.8$  Hz, 1H), 2.70 (dd,  $J = 16.6, 8.7$  Hz, 1H);  $^{13}\text{C}$  NMR (126 MHz,  $\text{CDCl}_3$ )  $\delta$  170.7, 166.1, 164.1, 157.4, 140.8, 130.8, 129.5, 123.6, 123.5, 123.1, 121.0, 117.4, 117.2, 111.9, 111.7, 110.3, 56.7, 55.3, 52.0, 40.5, 38.1; HRMS calculated for  $\text{C}_{18}\text{H}_{19}\text{FNO}_5\text{S}$  ( $\text{M}+\text{H}$ ) $^+$  380.0968; found 380.0980 (TOF MS EI+).

**Ethyl 2-(6-fluoro-3-oxo-2-(3,4,5-trimethoxybenzyl)isothiazolin-1-yl)acetate 1,1'-dioxide (68):** Prepared using general procedure **B**. FTIR (neat) 1731, 1593, 1463, 1298, 1126  $\text{cm}^{-1}$ ;  $^1\text{H}$  NMR (500 MHz,  $\text{CDCl}_3$ )  $\delta$  7.82 (dd,  $J = 8.6, 4.7$  Hz, 1H), 7.25 (dt,  $J = 8.5, 2.5$  Hz, 1H), 7.09 (d,  $J = 8.3$  Hz, 1H), 6.65 (s, 2H), 4.81 (t,  $J = 5.8$  Hz, 1H), 4.48 (q,  $J = 15.6$  Hz, 2H), 4.13 – 3.99 (m, 2H), 3.82 (s, 9H), 2.87 (dd,  $J = 16.5, 5.0$  Hz, 1H), 2.70 (dd,  $J = 16.5, 6.9$  Hz, 1H), 1.16 (t,  $J = 7.1$  Hz, 3H);  $^{13}\text{C}$  NMR (126 MHz,  $\text{CDCl}_3$ )  $\delta$  169.8, 166.2, 164.2, 153.4, 140.5, 137.5, 130.7, 123.6, 117.5, 117.4, 111.7, 111.5, 105.3, 61.2, 60.8, 56.8, 56.1, 47.3, 38.9, 13.9; HRMS calculated for  $\text{C}_{21}\text{H}_{25}\text{FNO}_7\text{S}$  ( $\text{M}+\text{H}$ ) $^+$  454.1336; found 454.1353 (TOF MS EI+).

**2-(4-(Dimethylamino)phenyl)-3-(2-oxopropyl)-5-(trifluoromethyl)isothiazolin-1-one 1,1'-dioxide (71):** Prepared using general procedure **B**. FTIR (neat) 1714, 1606, 1519, 1309, 1168  $\text{cm}^{-1}$ ;  $^1\text{H}$  NMR (500 MHz,  $\text{CDCl}_3$ )  $\delta$  7.98 (d,  $J = 8.1$  Hz, 1H), 7.84 (d,  $J = 8.1$  Hz, 1H), 7.75 (s, 1H), 7.35 – 7.28 (m, 2H), 6.79 – 6.69 (m, 2H), 5.47 (dd,  $J = 8.5, 3.7$  Hz, 1H), 3.13 (dd,  $J = 18.3, 3.7$  Hz, 1H), 3.00 (s, 6H), 2.91 (dd,  $J = 18.3, 8.5$  Hz, 1H), 2.13 (s, 3H);  $^{13}\text{C}$  NMR (126 MHz,  $\text{CDCl}_3$ )  $\delta$  205.7, 150.7, 138.6, 138.1, 129.7, 122.3, 122.1 (d,  $J_{\text{C-F}} = 3.9$ ), 120.2, 112.9, 58.6, 47.1, 40.4, 30.5; HRMS calculated for  $\text{C}_{19}\text{H}_{20}\text{F}_3\text{N}_2\text{O}_3\text{S}$  ( $\text{M}+\text{H}$ ) $^+$  413.1146; found 413.1144 (TOF MS EI+).

**(E)-Ethyl 3-(1-(2-ethoxy-2-oxoethyl)-2-octyl-3-oxoisindolin-5-yl)acrylate 1,1'-dioxide (89):**

Prepared using general procedure C. FTIR (neat) 2927, 2854, 1714, 1641, 1299, 1157  $\text{cm}^{-1}$ ;  $^1\text{H}$  NMR (500 MHz,  $\text{CDCl}_3$ )  $\delta$  7.92 (s, 1H), 7.73 – 7.65 (m, 2H), 7.45 (d,  $J = 8.1$  Hz, 1H), 6.51 (d,  $J = 16.0$  Hz, 1H), 4.96 – 4.89 (m, 1H), 4.28 (q,  $J = 7.1$  Hz, 2H), 4.24 – 4.13 (m, 2H), 3.32 (t,  $J = 7.6$  Hz, 2H), 2.98 (dd,  $J = 16.4, 5.3$  Hz, 1H), 2.77 (dd,  $J = 16.4, 7.0$  Hz, 1H), 1.73 (dd,  $J = 13.9, 6.8$  Hz, 2H), 1.41 – 1.18 (m, 16H), 0.87 (t,  $J = 7.0$  Hz, 3H);  $^{13}\text{C}$  NMR (126 MHz,  $\text{CDCl}_3$ )  $\delta$  170.2, 166.2, 141.7, 138.8, 136.3, 136.0, 132.3, 124.8, 121.1, 120.1, 61.3, 60.9, 57.4, 43.6, 39.0, 31.7, 27.8, 28.1, 26.8, 22.6, 14.2, 14.0; HRMS calculated for  $\text{C}_{24}\text{H}_{36}\text{NO}_6\text{S}$  ( $\text{M}+\text{H}$ ) $^+$  466.2263; found 466.2279 (TOF MS EI+).

**(E)-3-(1-(Carboxymethyl)-2-octyl-3-isothiazolin-5-yl)acrylic acid 1,1' dioxide (90):** Prepared using general procedure C. FTIR (neat) 2852, 1689, 1288, 1159  $\text{cm}^{-1}$ ;  $^1\text{H}$  NMR (500 MHz, MeOD)  $\delta$  8.03 (s, 1H), 7.94 (dd,  $J = 8.2, 1.5$  Hz, 1H), 7.75 (d,  $J = 16.0$  Hz, 1H), 7.65 (d,  $J = 8.1$  Hz, 1H), 6.65 (d,  $J = 16.0$  Hz, 1H), 4.97 (t,  $J = 5.9$  Hz, 1H), 3.36 (dd,  $J = 14.4, 8.2$  Hz, 2H), 2.98 (dd,  $J = 16.4, 5.8$  Hz, 1H), 2.85 (dd,  $J = 16.4, 6.0$  Hz, 1H), 1.74 (d,  $J = 5.7$  Hz, 2H), 1.44 – 1.24 (m, 12H), 0.90 (t,  $J = 7.0$  Hz, 3H);  $^{13}\text{C}$  NMR (126 MHz, MeOD)  $\delta$  172.1, 168.2, 142.1, 139.4, 136.4, 135.7, 132.2, 125.0, 120.9, 119.8, 58.1, 43.5, 38.4, 31.5, 28.9, 27.9, 26.5, 22.3, 13.0; HRMS calculated for  $\text{C}_{20}\text{H}_{28}\text{NO}_6\text{S}$  ( $\text{M}+\text{H}$ ) $^+$  410.1637; found 410.1669 (TOF MS EI+).

**(E)-2-Octyl-6-(3-oxobut-1-enyl)-3-(2-oxopropyl)isothiazolin-1-one 1,1' dioxide (91):** Prepared using general procedure C. FTIR (neat) 2925, 2854, 1716, 1672, 1294, 1157  $\text{cm}^{-1}$ ;  $^1\text{H}$  NMR (500 MHz,  $\text{CDCl}_3$ )  $\delta$  7.92 (d,  $J = 1.2$  Hz, 1H), 7.70 (dd,  $J = 8.2, 1.5$  Hz, 1H), 7.51 (d,  $J = 16.2$  Hz, 1H), 7.42 (d,  $J = 8.1$  Hz, 1H), 6.78 (d,  $J = 16.2$  Hz, 1H), 5.04 (dd,  $J = 7.2, 5.2$  Hz, 1H), 3.34 – 3.19 (m, 2H), 3.16 (dd,  $J = 18.1, 5.2$  Hz, 1H), 2.88 (dd,  $J = 18.1, 7.3$  Hz, 1H), 2.40 (s, 3H), 2.23 (s, 3H), 1.75 – 1.59 (m, 2H), 1.41 – 1.17 (m, 10H), 0.87 (t,  $J = 7.0$  Hz, 3H);  $^{13}\text{C}$  NMR (126 MHz,  $\text{CDCl}_3$ )  $\delta$  205.7, 197.5, 140.1, 136.2, 132.4, 129.0, 125.2, 120.3, 56.3, 47.9, 44.1, 31.7, 30.8, 29.1, 28.1, 28.0, 26.8, 22.6, 14.0; HRMS calculated for  $\text{C}_{22}\text{H}_{32}\text{NO}_4\text{S}$  ( $\text{M}+\text{H}$ ) $^+$  406.2052; found 406.2072 (TOF MS EI+).



**(E)-Methyl 3-(1-(2-methoxy-2-oxoethyl)-2-(2-methoxyphenyl)-3-oxoisindolin-5-yl)acrylate 1,1'-dioxide (92):** Prepared using general procedure C. FTIR (neat) 1720, 1600, 1490, 1305, 1207  $\text{cm}^{-1}$ ;  $^1\text{H}$  NMR (500 MHz,  $\text{CDCl}_3$ )  $\delta$  8.00 (d,  $J = 1.2$  Hz, 1H), 7.77 (dd,  $J = 8.2, 1.5$  Hz, 1H), 7.73 (d,  $J = 16.0$  Hz, 1H), 7.56 (d,  $J = 8.1$  Hz, 1H), 7.37 (t,  $J = 8.2$  Hz, 1H), 7.06 (ddd,  $J = 8.0, 2.1, 0.8$  Hz, 1H), 7.03 (t,  $J = 2.2$  Hz, 1H), 6.88 (ddd,  $J = 8.4, 2.5, 0.8$  Hz, 1H), 6.55 (d,  $J = 16.0$  Hz, 1H), 5.57 (dd,  $J = 8.2, 4.1$  Hz, 1H), 3.84 (d,  $J = 1.8$  Hz, 6H), 3.64 (s, 3H), 3.00 (dd,  $J = 16.4, 4.2$  Hz, 1H), 2.78 (dd,  $J = 16.4, 8.2$  Hz, 1H);  $^{13}\text{C}$  NMR (126 MHz,  $\text{CDCl}_3$ )  $\delta$  170.5, 166.6, 160.7, 141.8, 137.5, 136.5, 135.5, 135.0, 132.7, 130.6, 124.9, 120.9, 120.4, 117.3, 113.2, 111.0, 58.1, 55.4, 52.1, 52.0, 38.3; HRMS calculated for  $\text{C}_{21}\text{H}_{22}\text{NO}_7\text{S}$  ( $\text{M}+\text{H}$ ) $^+$  432.1117; found 432.1127 (TOF MS EI+).

| <b>Compound No.</b>   | <b>Calc. Mass</b> | <b>Mass Found</b> | <b>Compound No.</b>   | <b>Calc. Mass</b> | <b>Mass Found</b> |
|-----------------------|-------------------|-------------------|-----------------------|-------------------|-------------------|
| <b>1</b>              | 284.0957          | 284.0963          | <b>26</b>             | 350.0862          | 350.0887          |
| <b>2</b>              | 348.0906          | 348.0915          | <b>27</b>             | 380.0968          | 380.0990          |
| <b>3</b>              | 362.1062          | 362.1080          | <b>28</b>             | 394.1124          | 394.1134          |
| <b>4</b>              | 332.0957          | 332.0978          | <b>29</b>             | 364.1019          | 364.1033          |
| <b>5</b>              | 362.1062          | 362.1088          | <b>30</b>             | 386.1723          | 386.1811          |
| <b>6</b>              | 376.1219          | 376.1225          | <b>31</b>             | 314.0862          | 314.0872          |
| <b>7</b>              | 296.0957          | 296.0976          | <b>32</b>             | 328.1019          | 328.1036          |
| <b>8</b>              | 310.1113          | 310.1138          | <b>33<sup>2</sup></b> | 339.0815          | 339.0833          |
| <b>9</b>              | 304.0644          | 304.0666          | <b>34</b>             | 366.0811          | 366.0819          |
| <b>10</b>             | 334.0749          | 334.0761          | <b>35</b>             | 336.0706          | 336.0716          |
| <b>11</b>             | 348.0906          | 348.0915          | <b>36</b>             | 358.1488          | 358.1513          |
| <b>12</b>             | 294.1164          | 294.1181          | <b>37<sup>2</sup></b> | 369.1069          | 369.1104          |
| <b>13</b>             | 308.1320          | 308.1335          | <b>38<sup>2</sup></b> | 383.1257          | 383.1259          |
| <b>14</b>             | 302.0851          | 302.0865          | <b>39</b>             | 378.0987          | 378.1011          |
| <b>15</b>             | 332.0957          | 332.0974          | <b>40</b>             | 392.1143          | 392.1152          |
| <b>16</b>             | 302.0862          | 302.0876          | <b>41<sup>2</sup></b> | 447.1202          | 447.1183          |
| <b>17<sup>2</sup></b> | 333.1284          | 333.1293          | <b>42</b>             | 400.0830          | 400.0863          |
| <b>18</b>             | 336.0706          | 336.0741          | <b>43<sup>2</sup></b> | 439.1887          | 439.1884          |
| <b>19</b>             | 380.0968          | 380.0977          | <b>44<sup>2</sup></b> | 383.1252          | 383.1260          |
| <b>20</b>             | 350.0862          | 350.0870          | <b>45<sup>3</sup></b> | 805.2028          | 805.2031          |
| <b>21</b>             | 371.1567          | 371.1574          | <b>46<sup>2</sup></b> | 423.1565          | 423.1585          |
| <b>22<sup>2</sup></b> | 333.1284          | 333.1116          | <b>47<sup>2</sup></b> | 447.1202          | 447.1220          |
| <b>23<sup>2</sup></b> | 347.1441          | 347.1458          | <b>48<sup>2</sup></b> | 461.1358          | 461.1370          |
| <b>24</b>             | 342.1175          | 342.1182          | <b>49</b>             | 414.0987          | 414.1272          |
| <b>25</b>             | 356.1332          | 356.1349          | <b>50</b>             | 435.1691          | 435.2048          |

| Compound No.    | Calc. Mass | Mass Found | Compound No.    | Calc. Mass | Mass Found |
|-----------------|------------|------------|-----------------|------------|------------|
| 51 <sup>2</sup> | 369.1096   | 369.1113   | 74              | 414.0987   | 414.1002   |
| 52 <sup>2</sup> | 381.1096   | 381.1100   | 75              | 478.2239   | 478.2253   |
| 53 <sup>2</sup> | 395.1252   | 395.1270   | 76 <sup>2</sup> | 481.2348   | 481.2343   |
| 54 <sup>2</sup> | 433.1045   | 433.1039   | 77              | 479.2555   | 479.2568   |
| 55 <sup>2</sup> | 403.0939   | 403.0960   | 78              | 397.1034   | 397.1047   |
| 56 <sup>2</sup> | 425.1722   | 425.1746   | 79              | 451.1503   | 451.1512   |
| 57              | 361.1222   | 361.1239   | 80              | 435.1554   | 435.1565   |
| 58              | 399.1742   | 399.1750   | 81              | 384.0717   | 384.0725   |
| 59              | 348.0906   | 348.0919   | 82              | 446.2177   | 446.2186   |
| 60              | 394.2416   | 394.2435   | 83              | 447.2493   | 447.2474   |
| 61              | 414.0987   | 414.1001   | 84              | 446.1273   | 446.1269   |
| 62              | 436.1430   | 436.1427   | 85              | 474.1586   | 474.1598   |
| 63              | 379.1128   | 379.1143   | 86              | 418.0960   | 418.0975   |
| 64              | 363.1179   | 363.1185   | 87              | 414.1375   | 414.1364   |
| 65              | 419.1441   | 419.1463   | 88              | 432.1117   | 432.1118   |
| 66              | 380.0968   | 380.0980   | 89              | 460.1430   | 460.1442   |
| 67              | 366.0811   | 366.0820   | 90              | 404.0804   | 404.0812   |
| 68              | 454.1336   | 454.1353   | 91              | 400.1219   | 400.1228   |
| 69              | 429.1096   | 429.1103   | 92              | 438.1950   | 438.1964   |
| 70              | 415.0939   | 415.0945   | 93              | 466.2263   | 466.2279   |
| 71              | 413.1147   | 413.1158   | 94              | 410.1637   | 410.1669   |
| 72              | 469.1409   | 469.1455   | 95              | 406.2052   | 406.2072   |
| 73              | 430.0936   | 430.0950   |                 |            |            |

<sup>1</sup> (M + H)<sup>+</sup> peak reported unless otherwise stated, <sup>2</sup> (M + NH<sub>4</sub>)<sup>+</sup> peak reported, <sup>3</sup> (2M + Na)<sup>+</sup> peak reported

11.

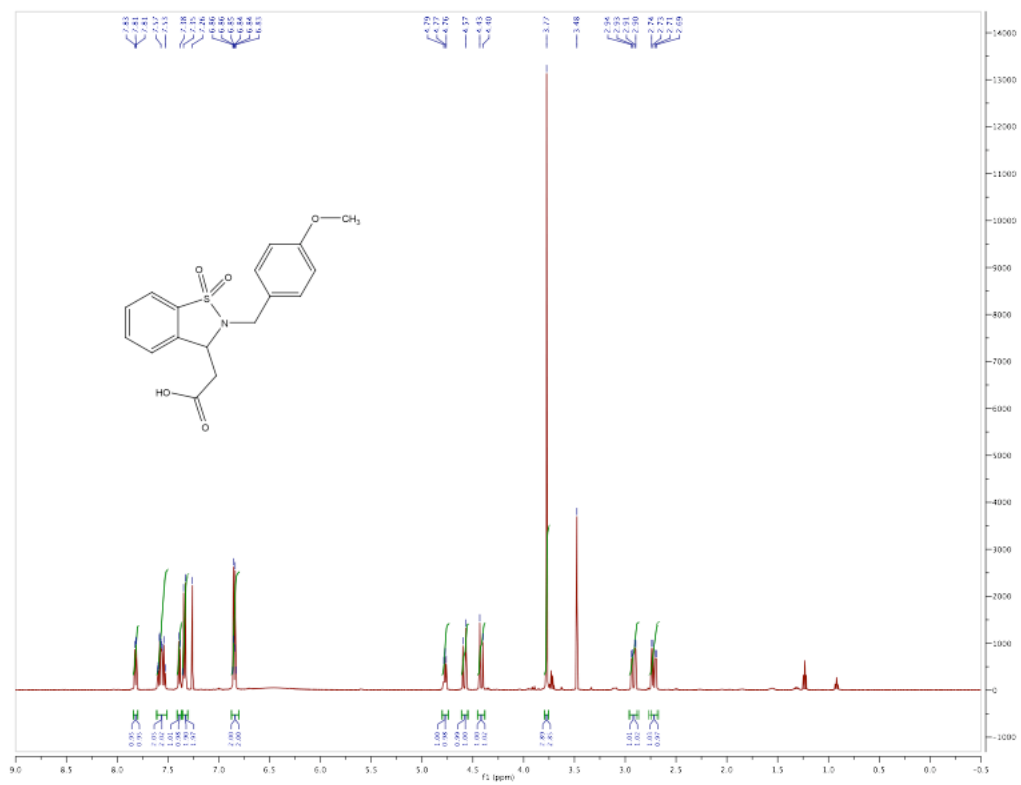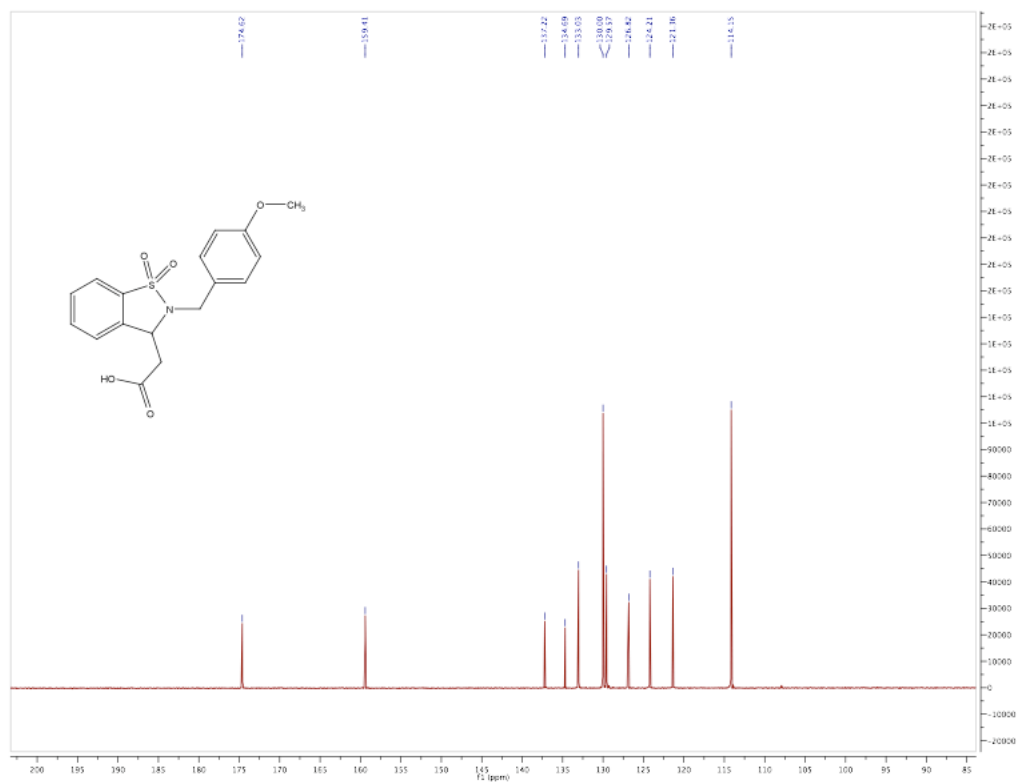

14.

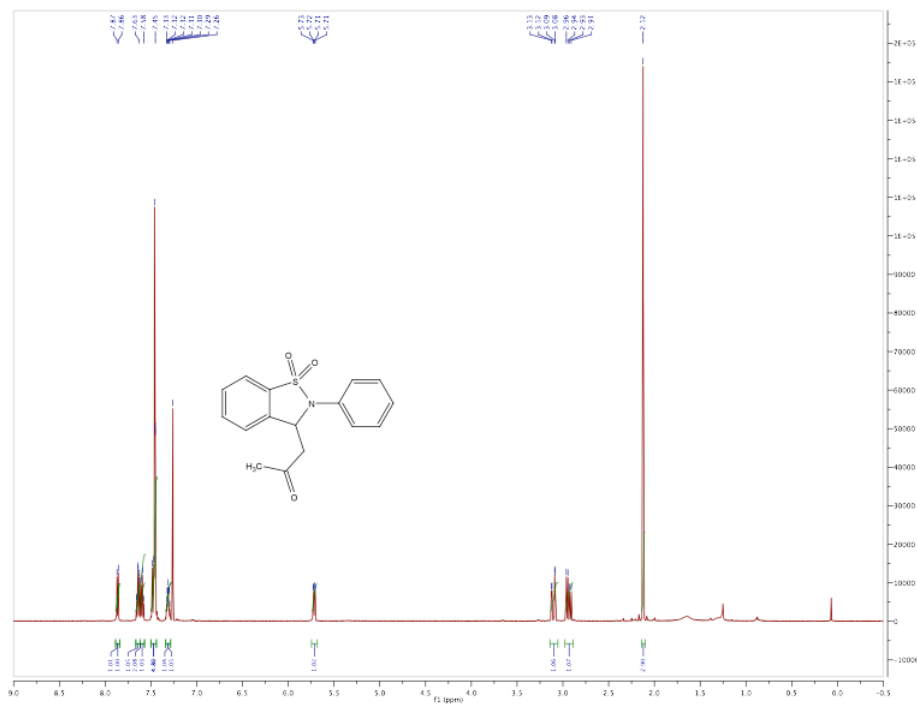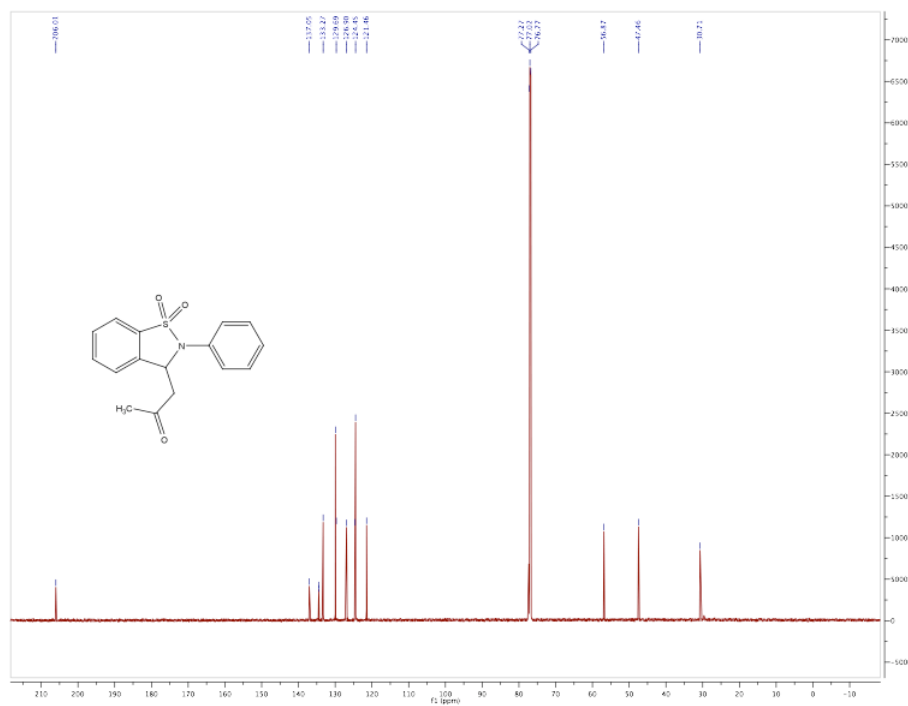

21.

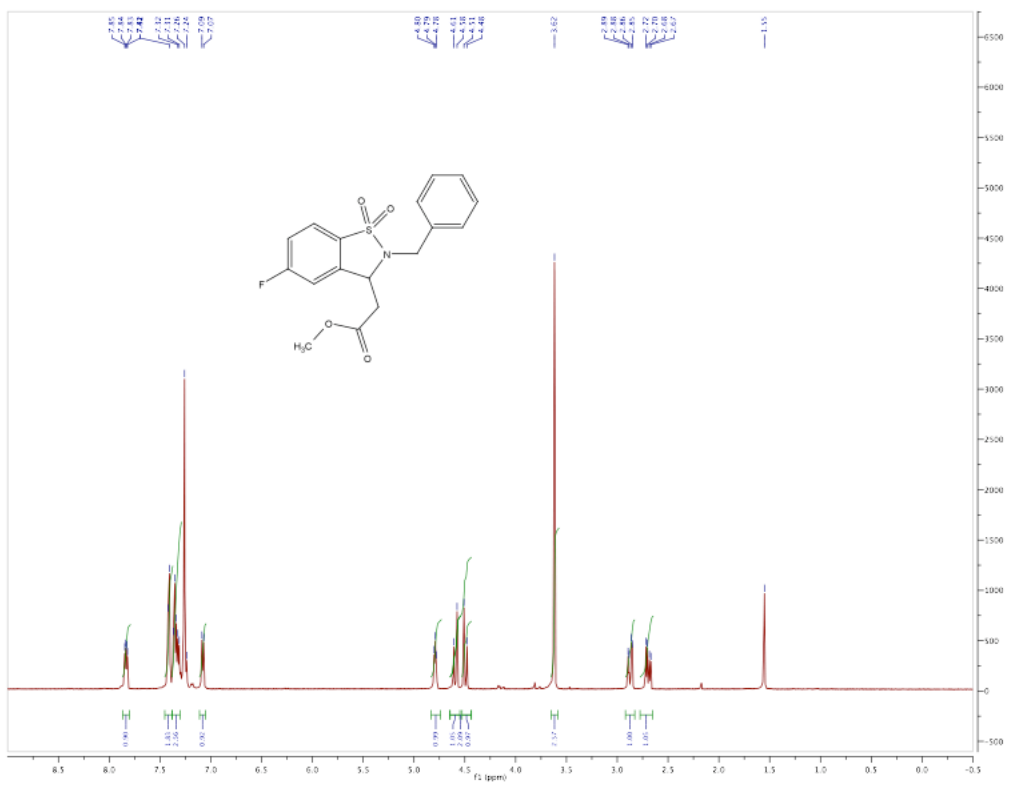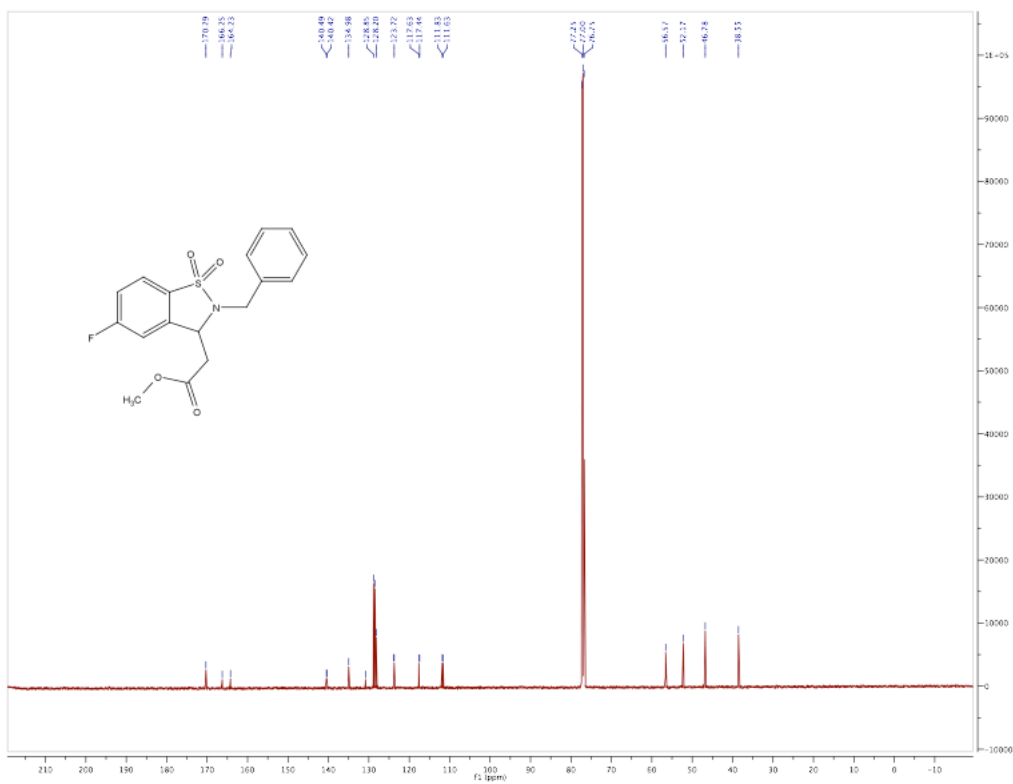

24.

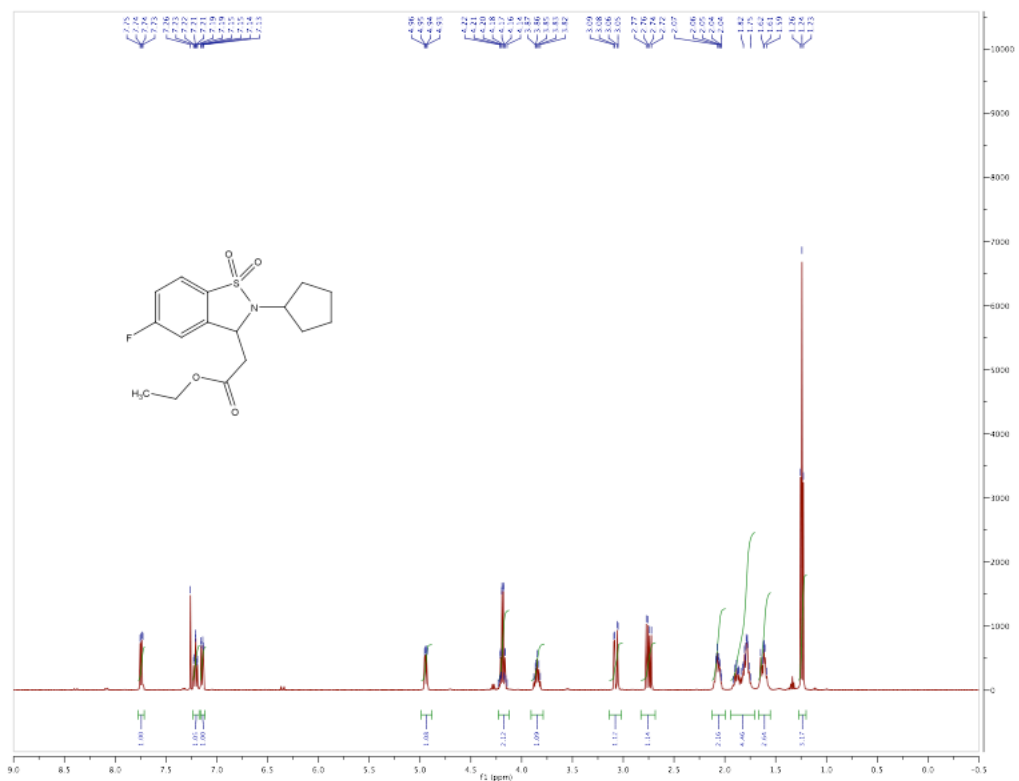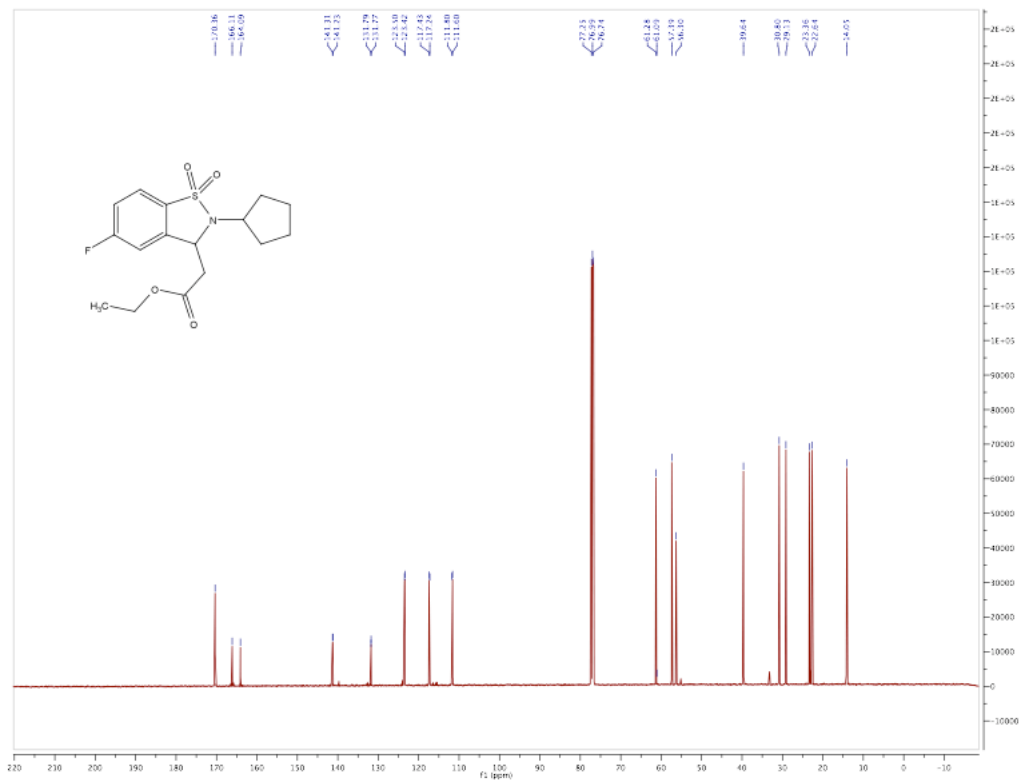

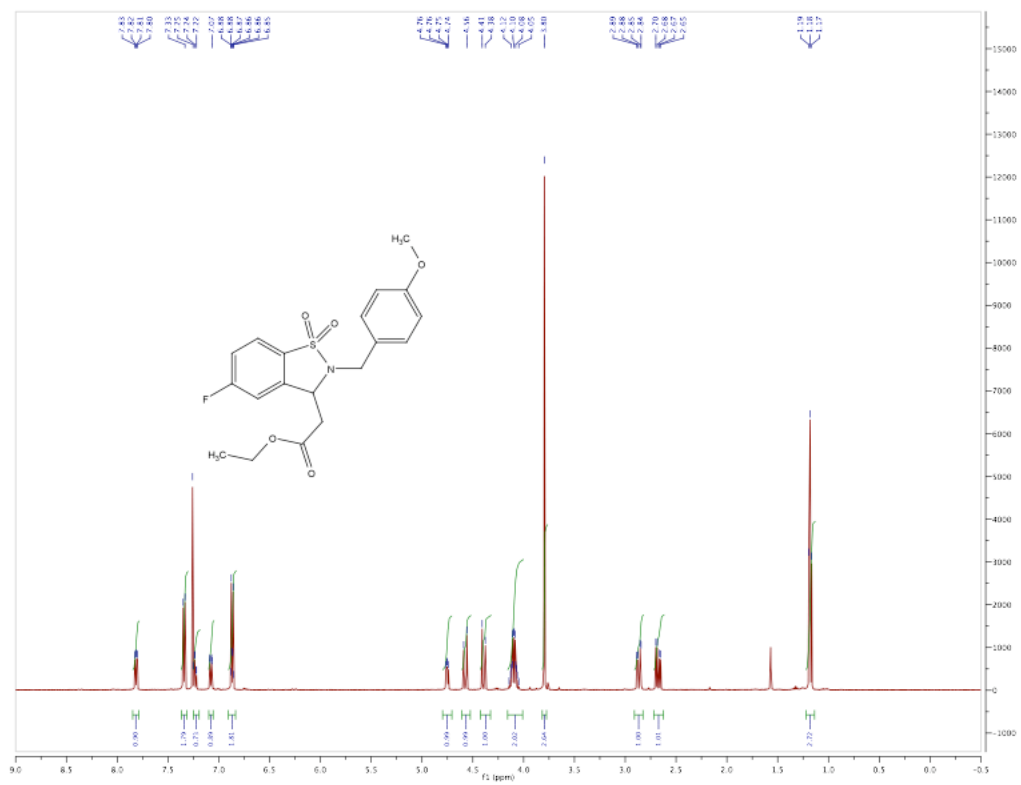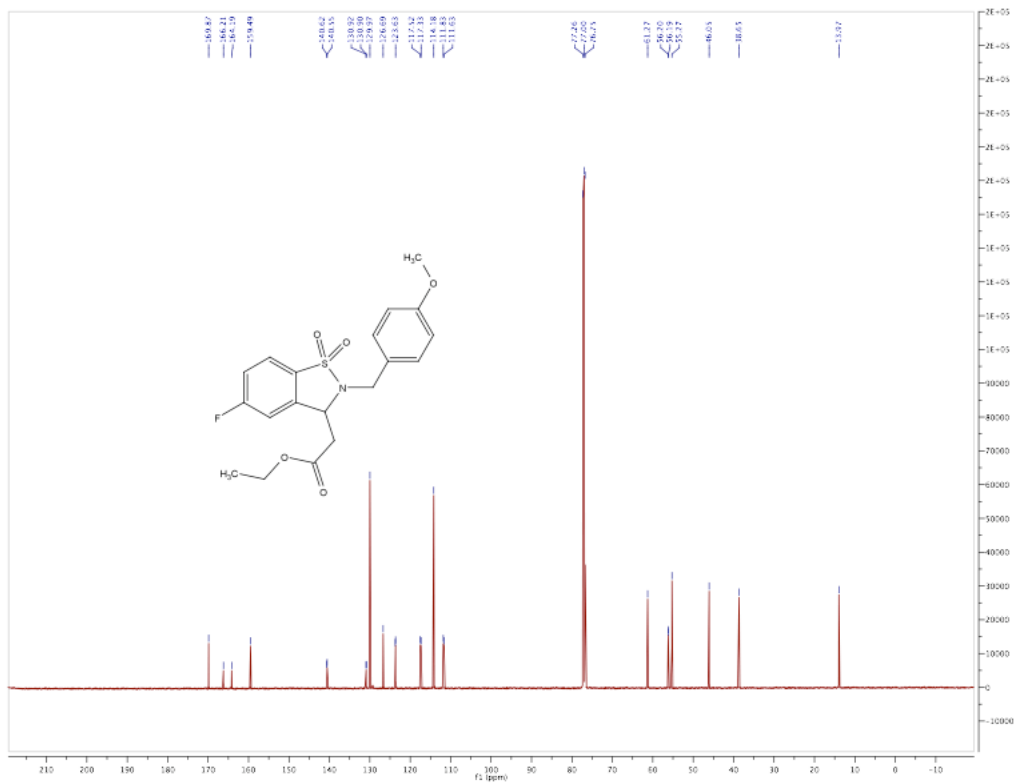



30.

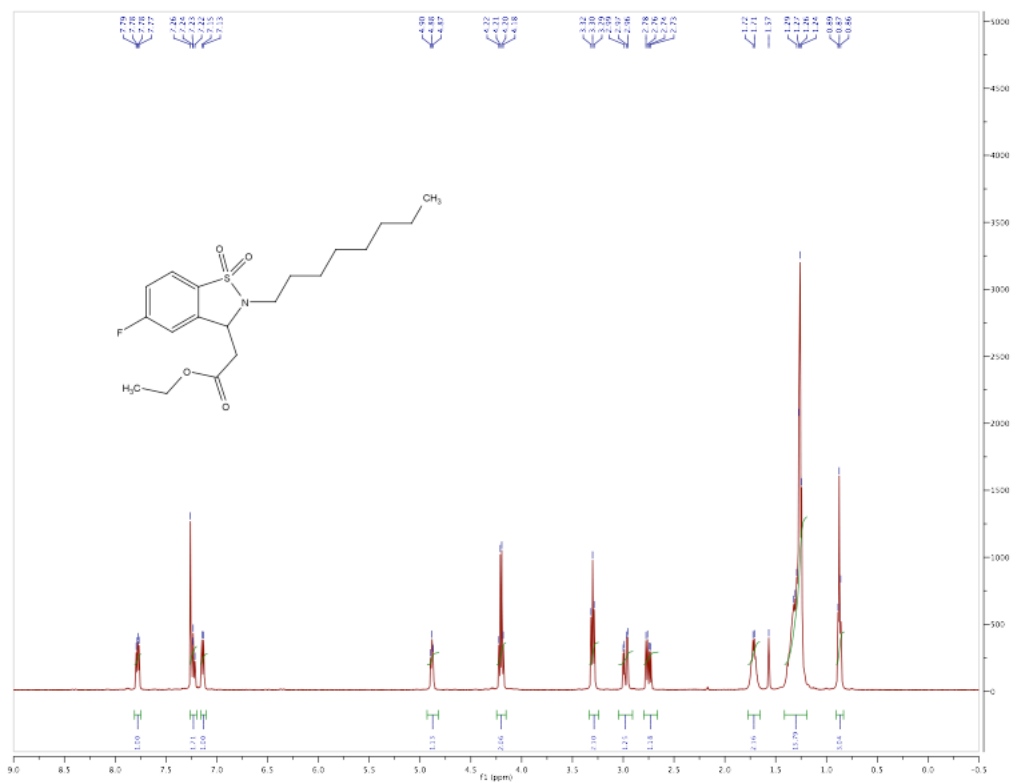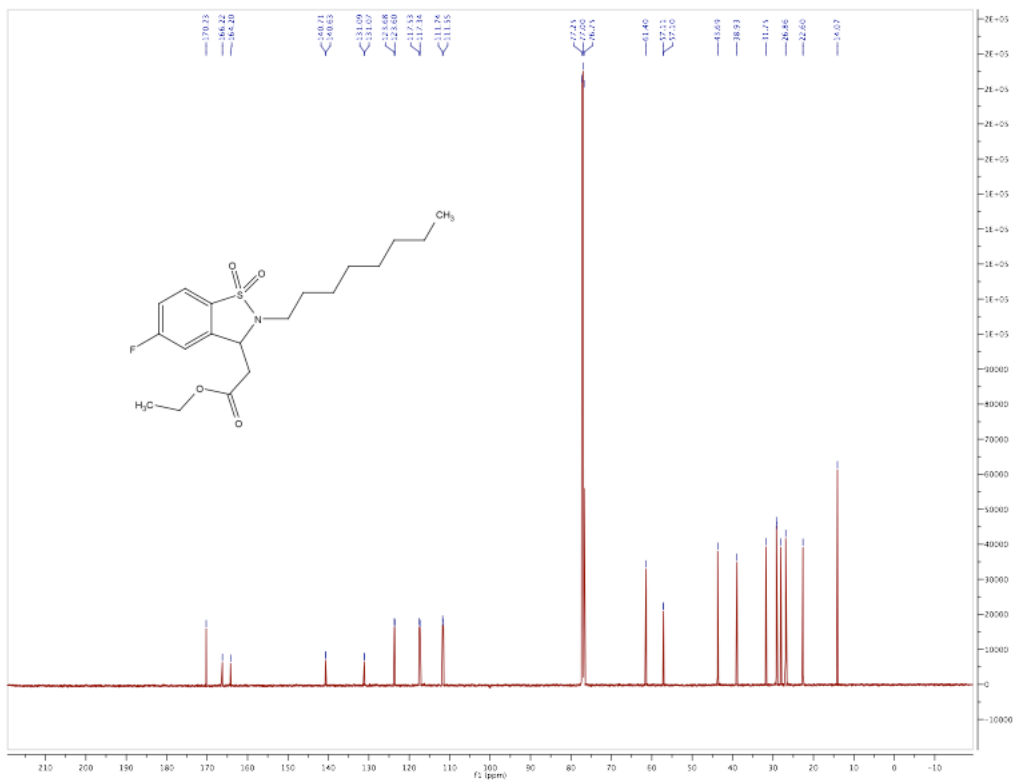

31.

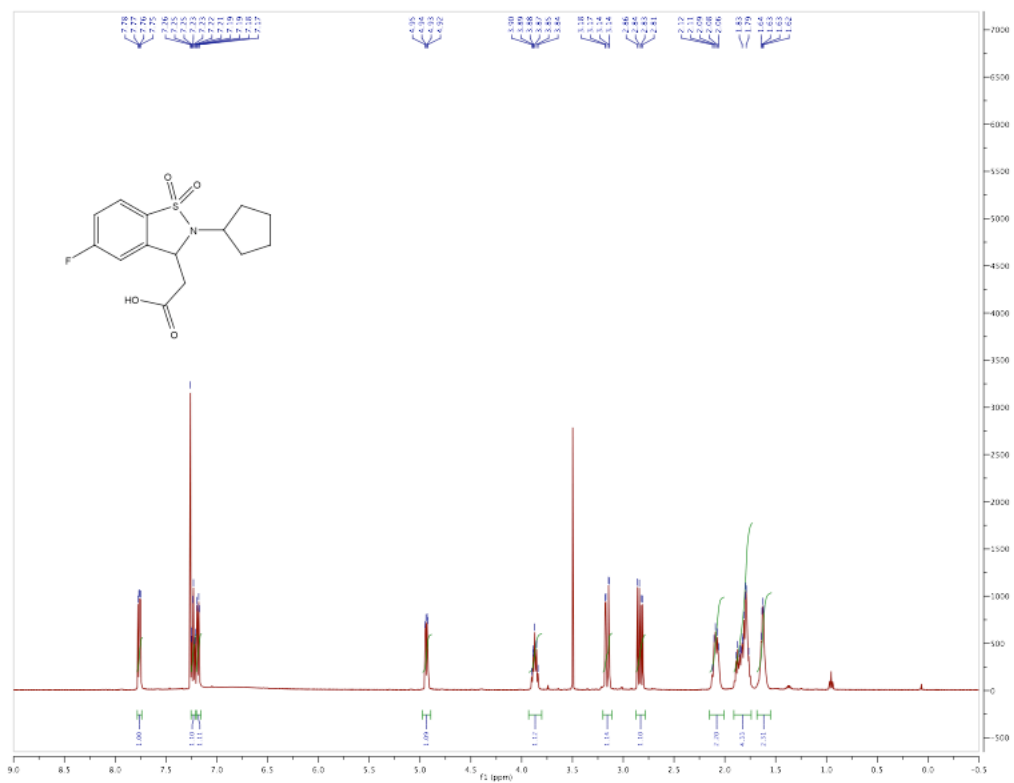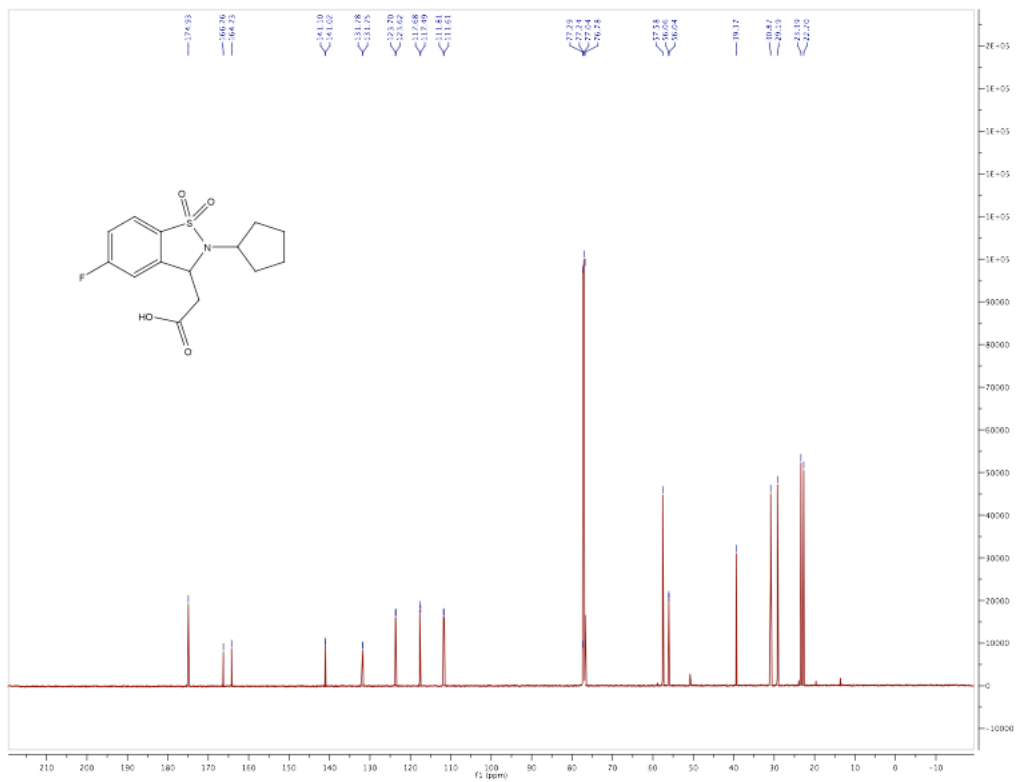

34.

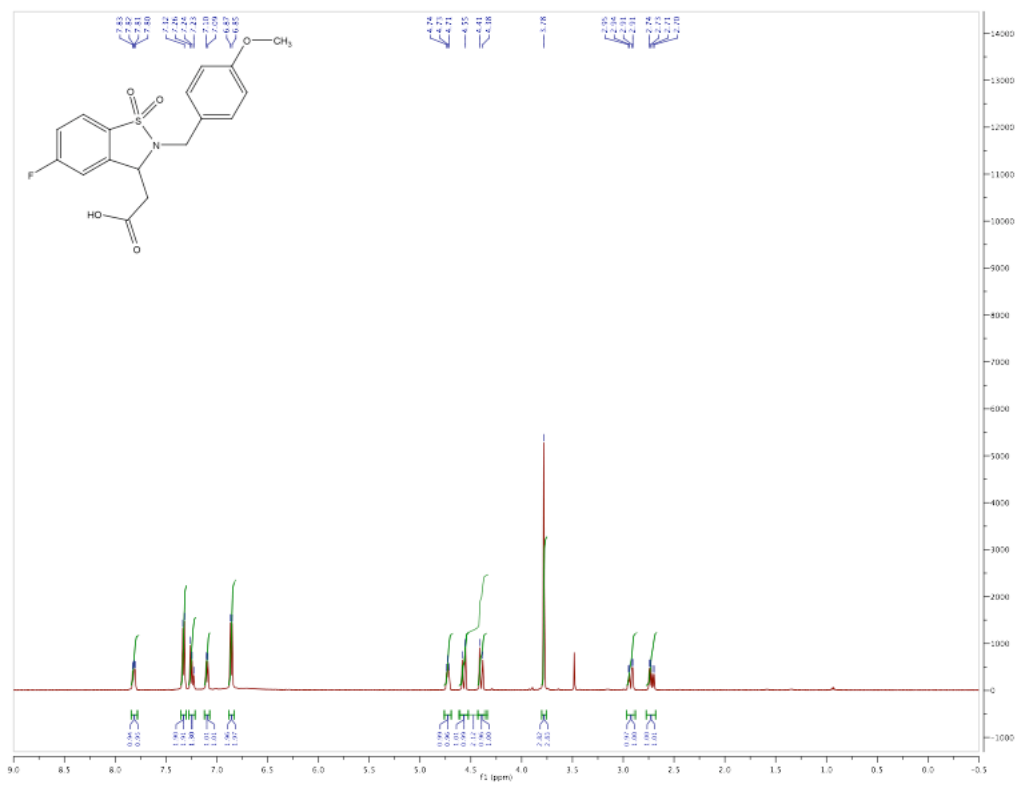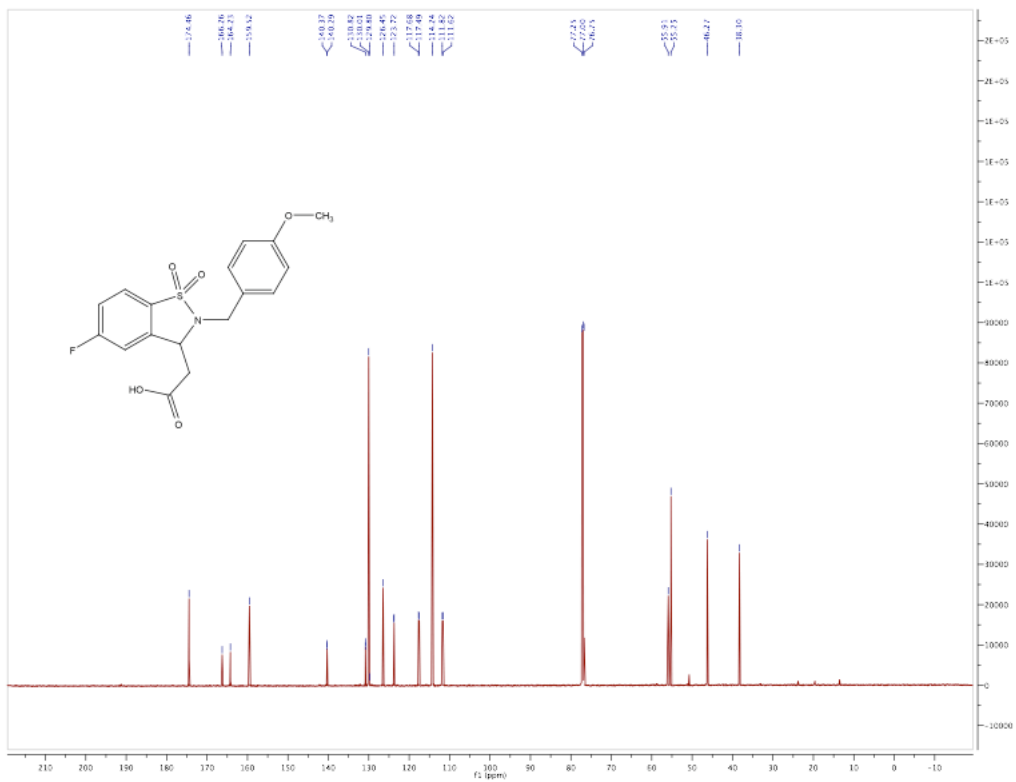

44.

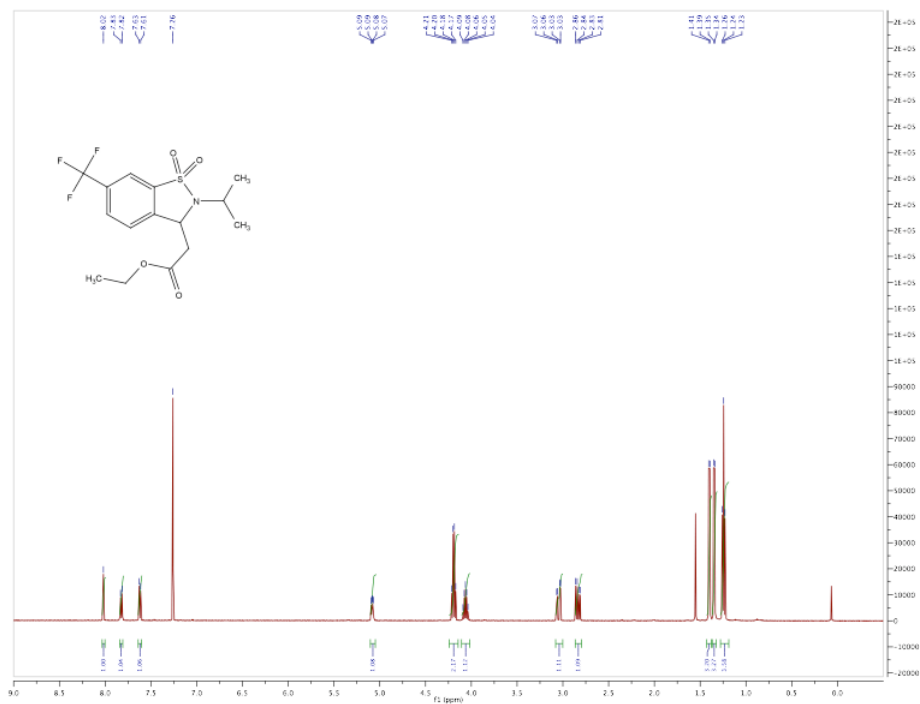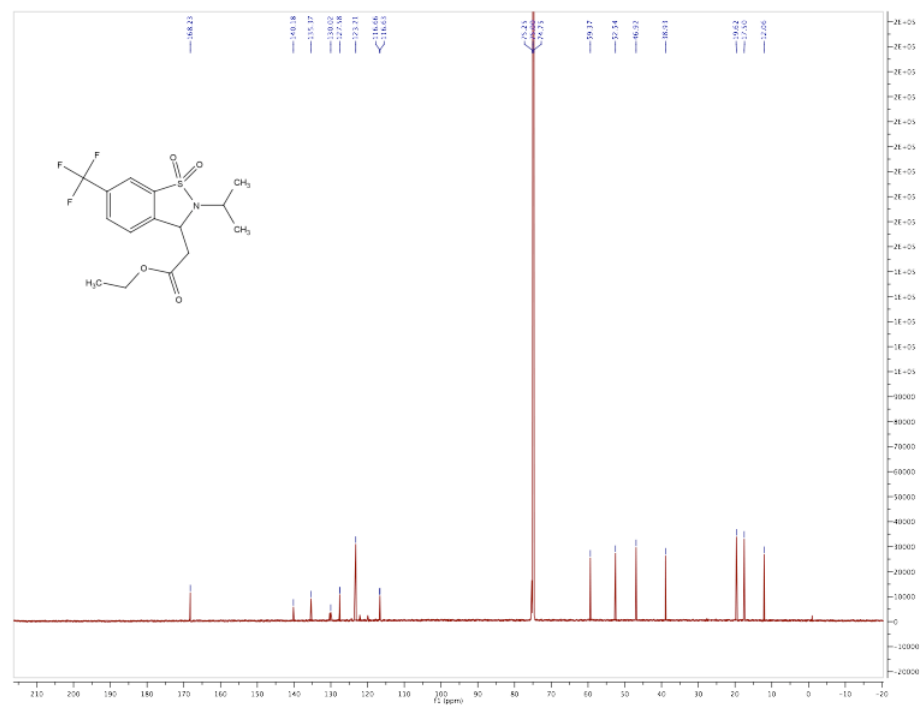

47.

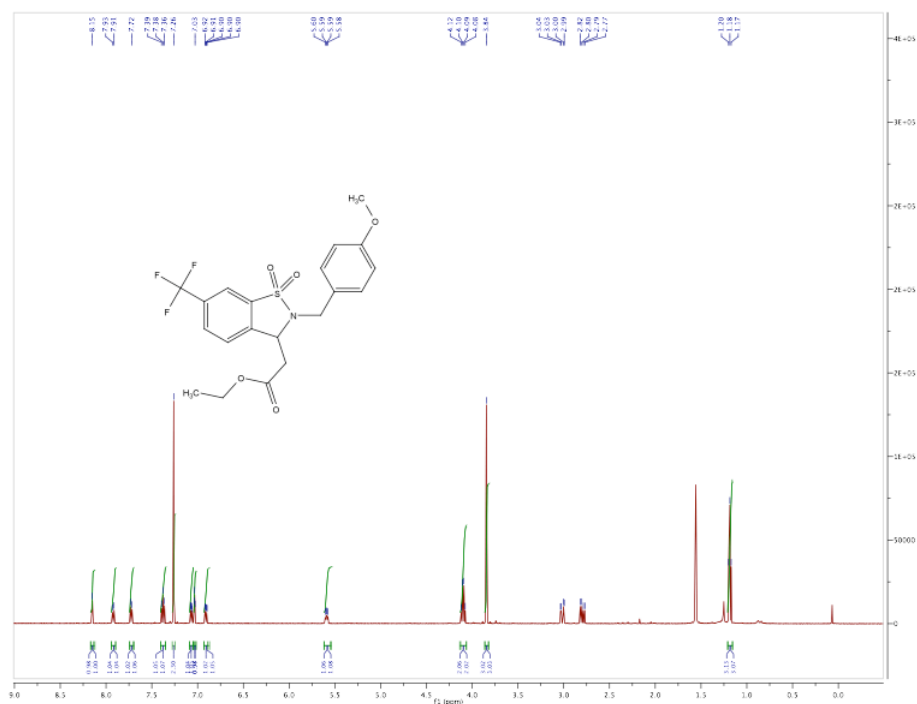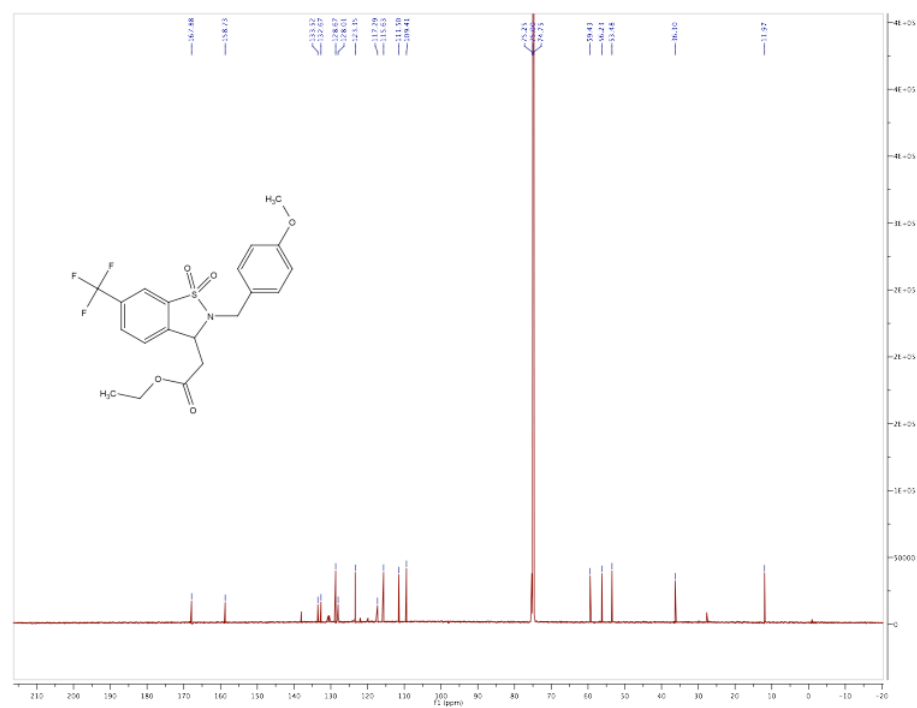

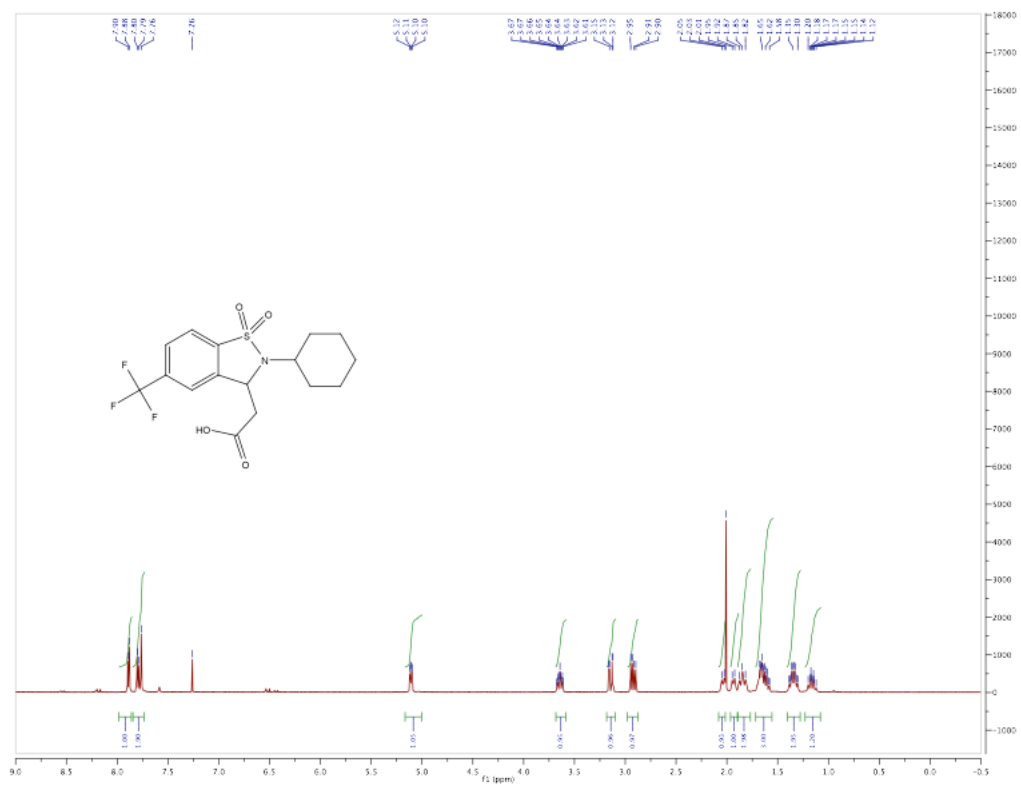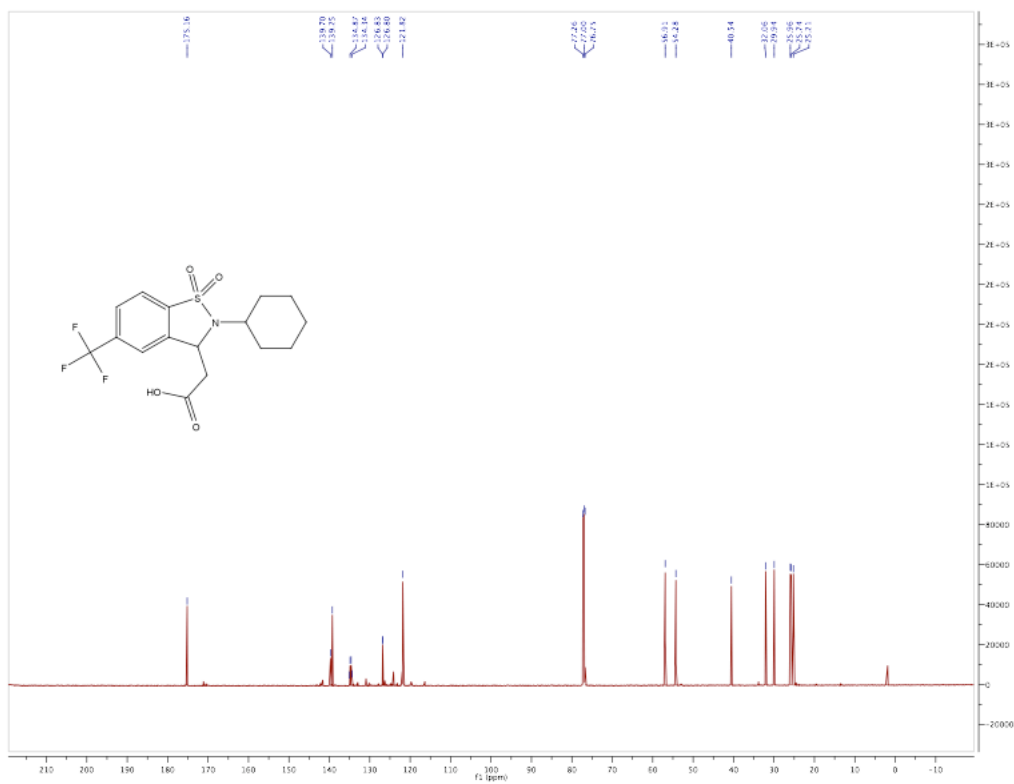

61.

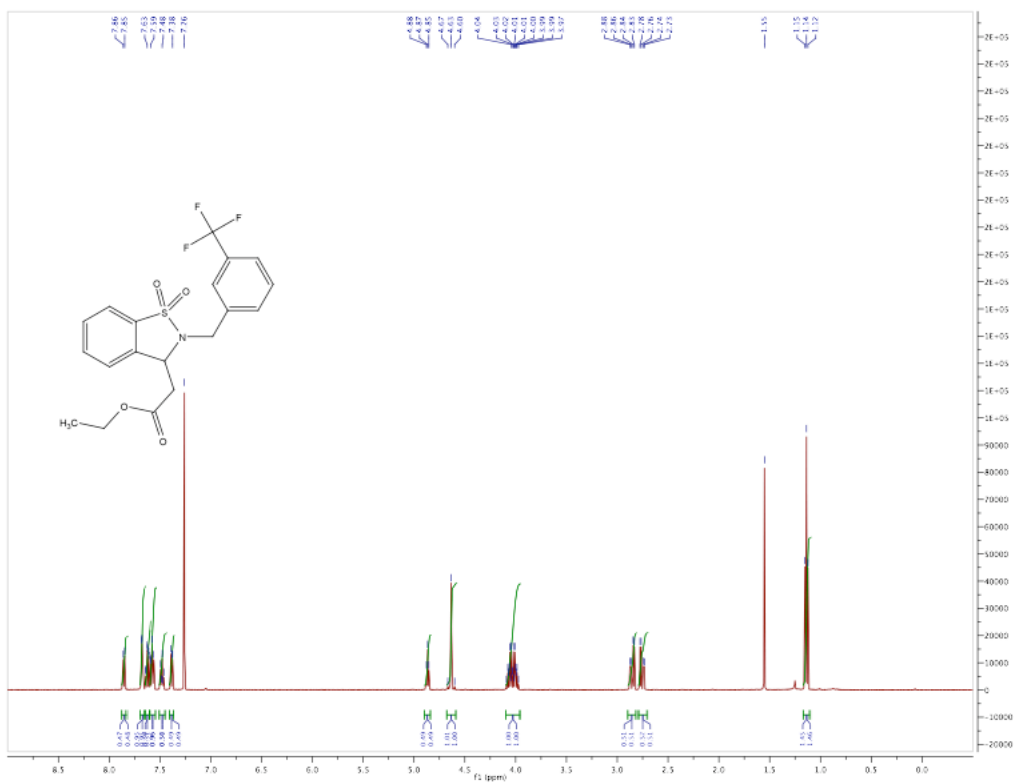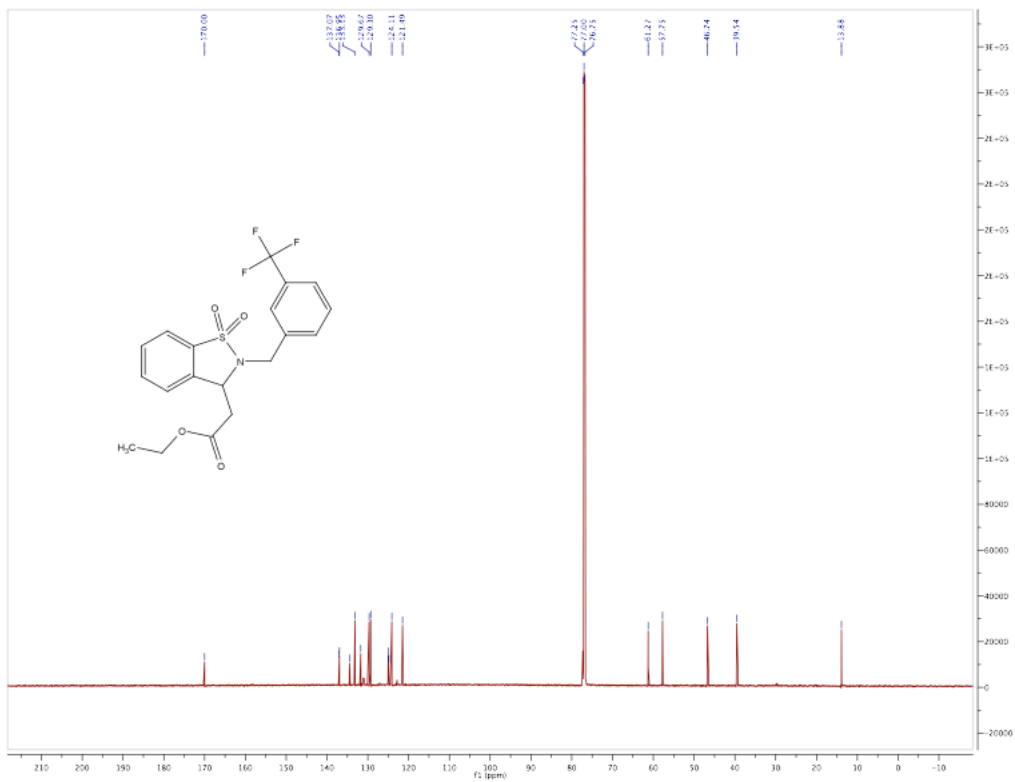

63.

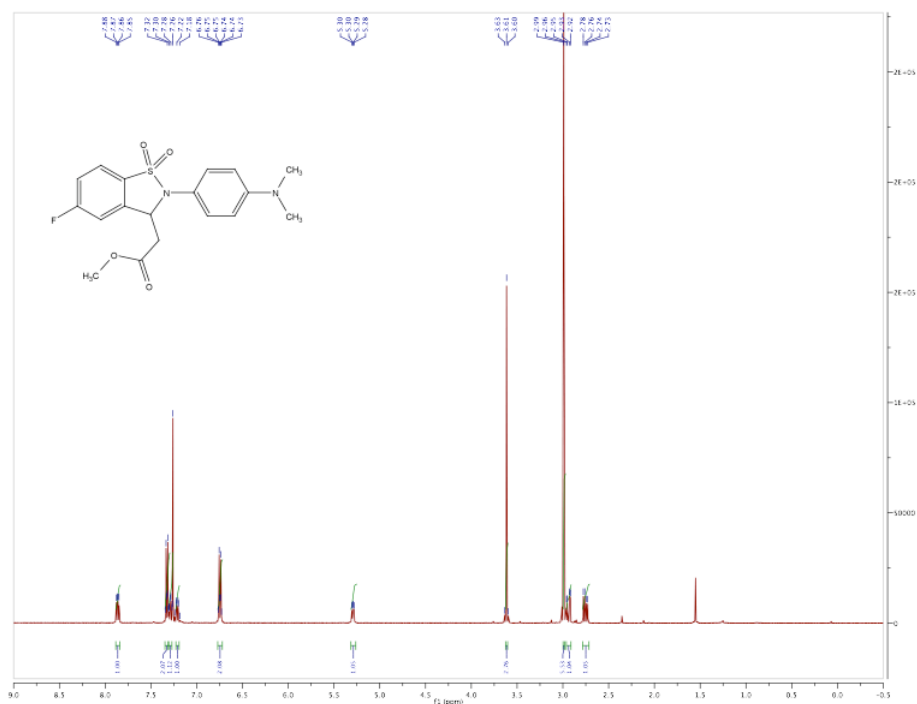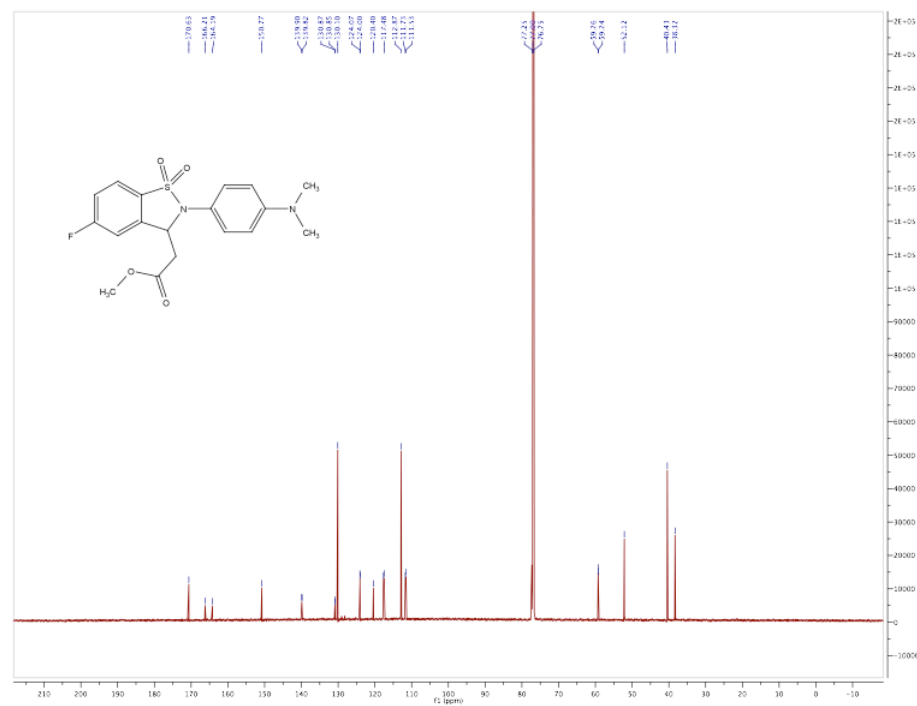



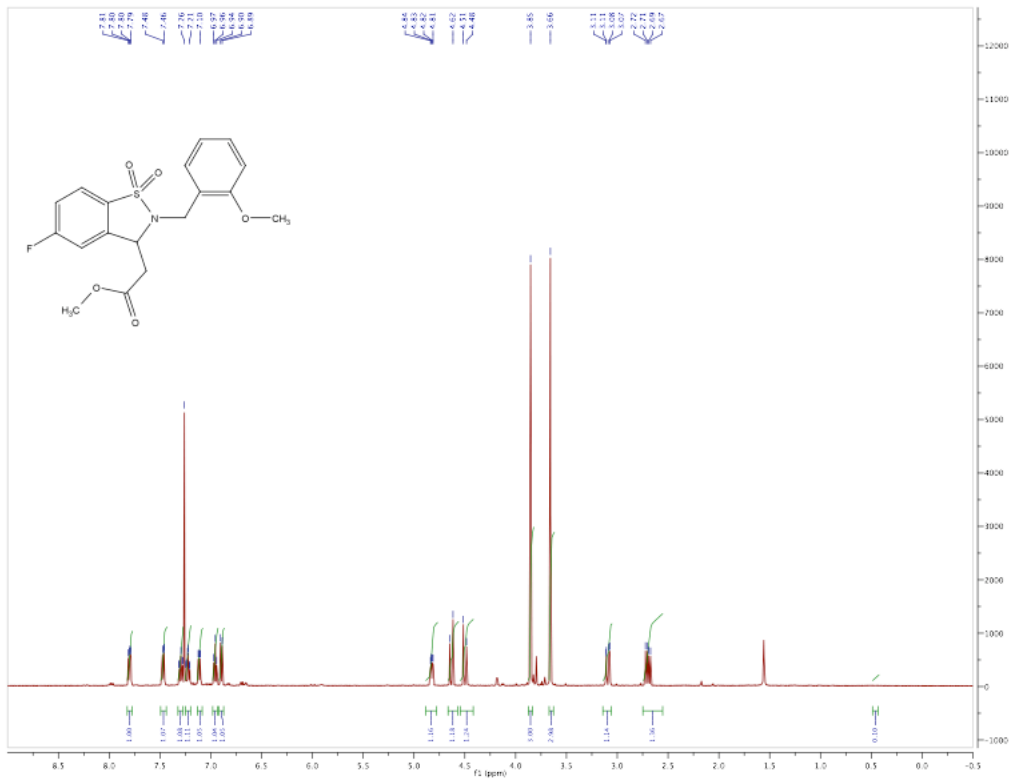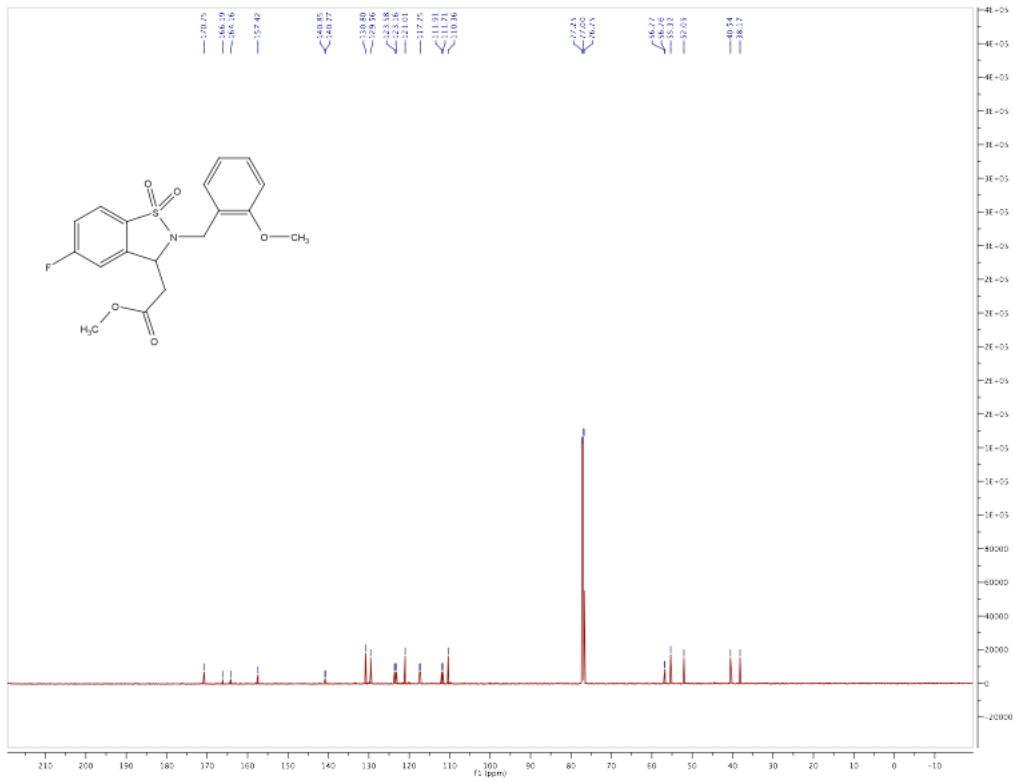

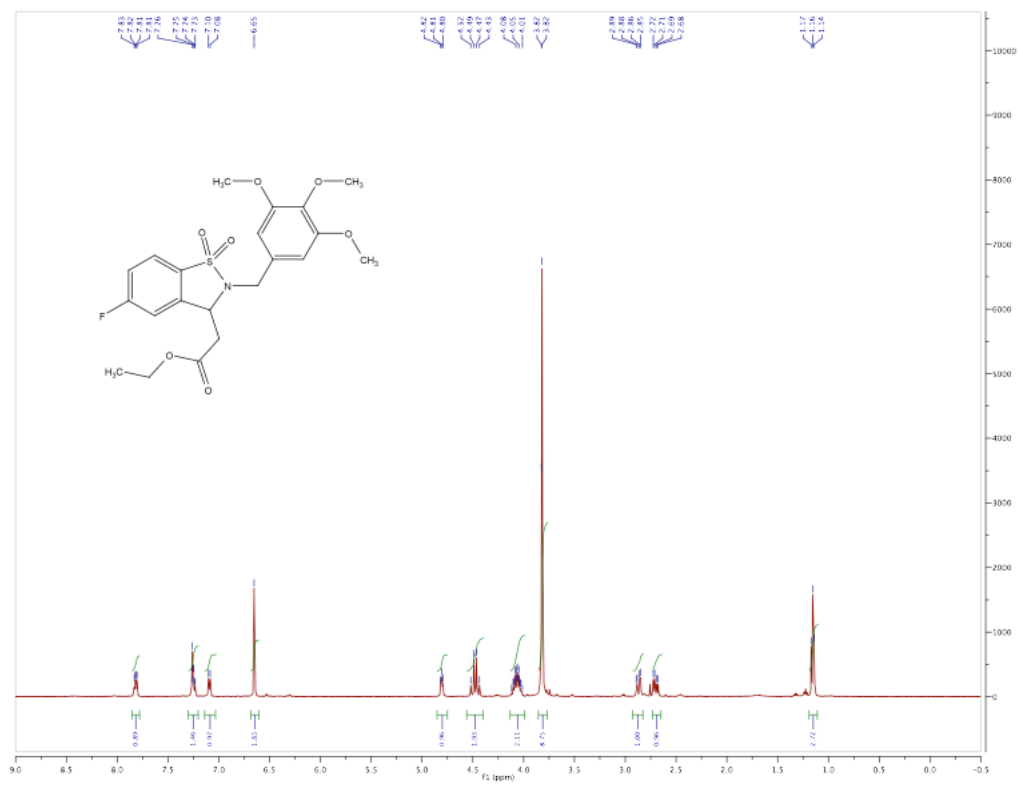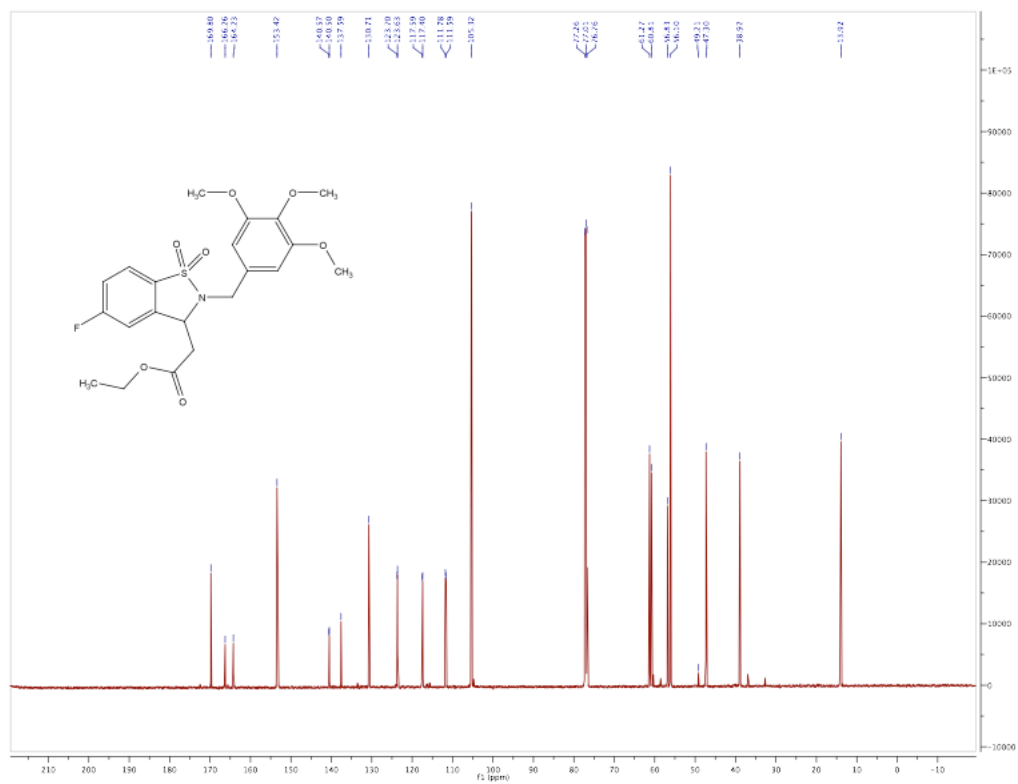



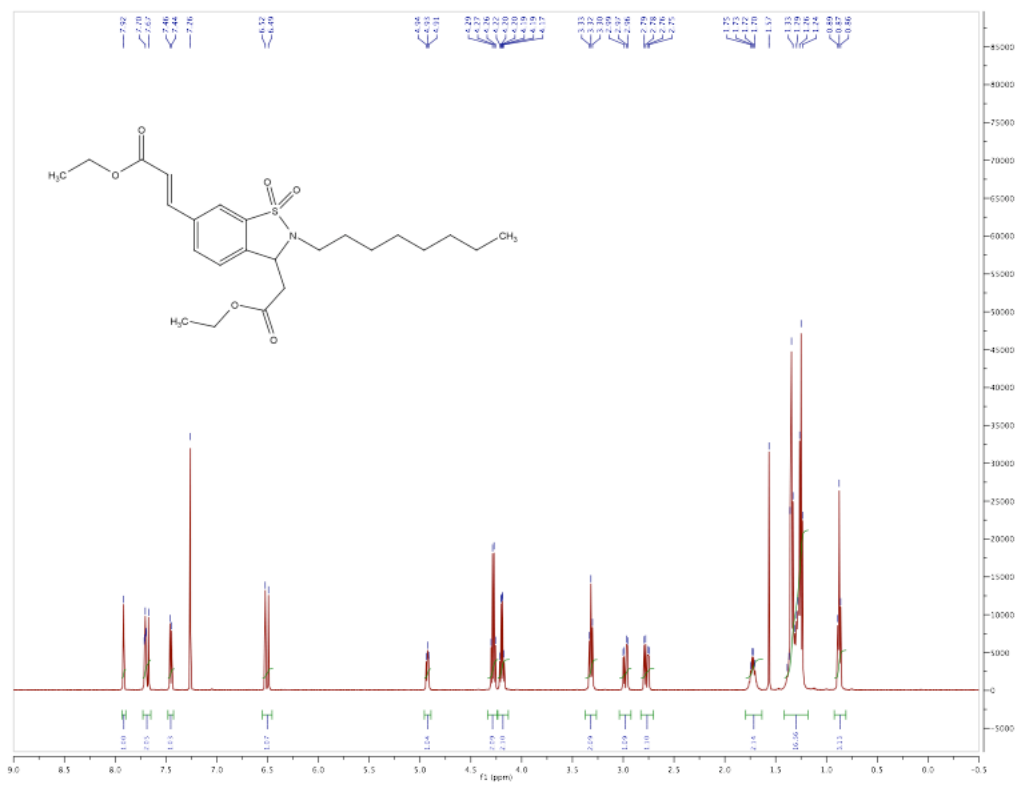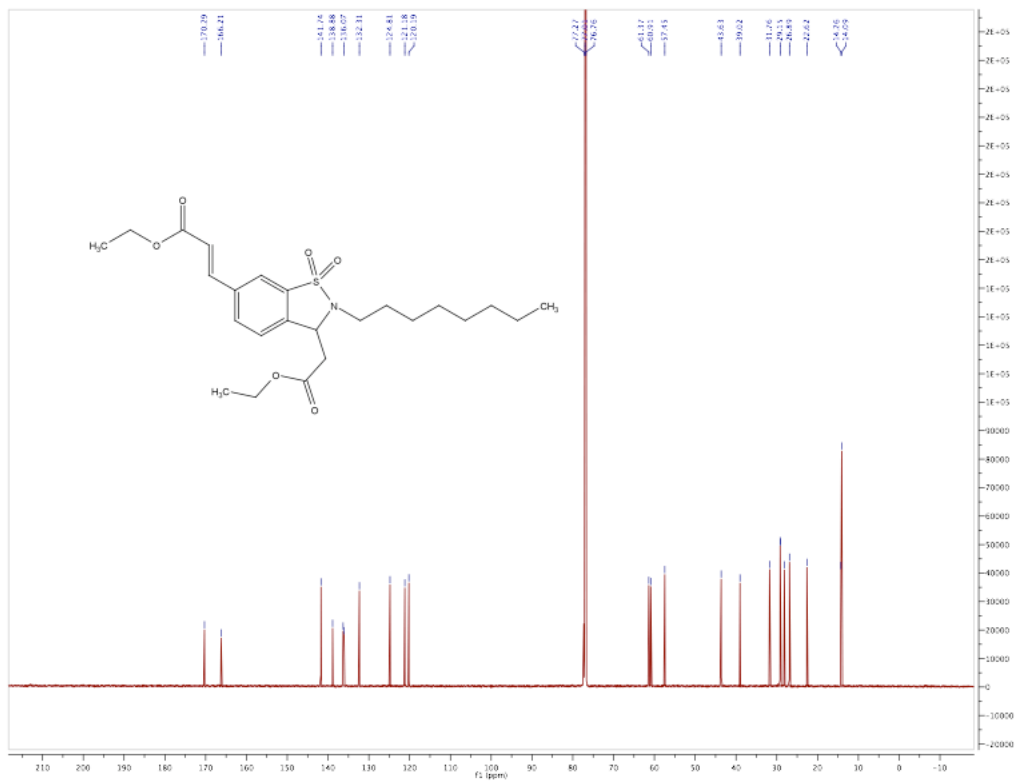

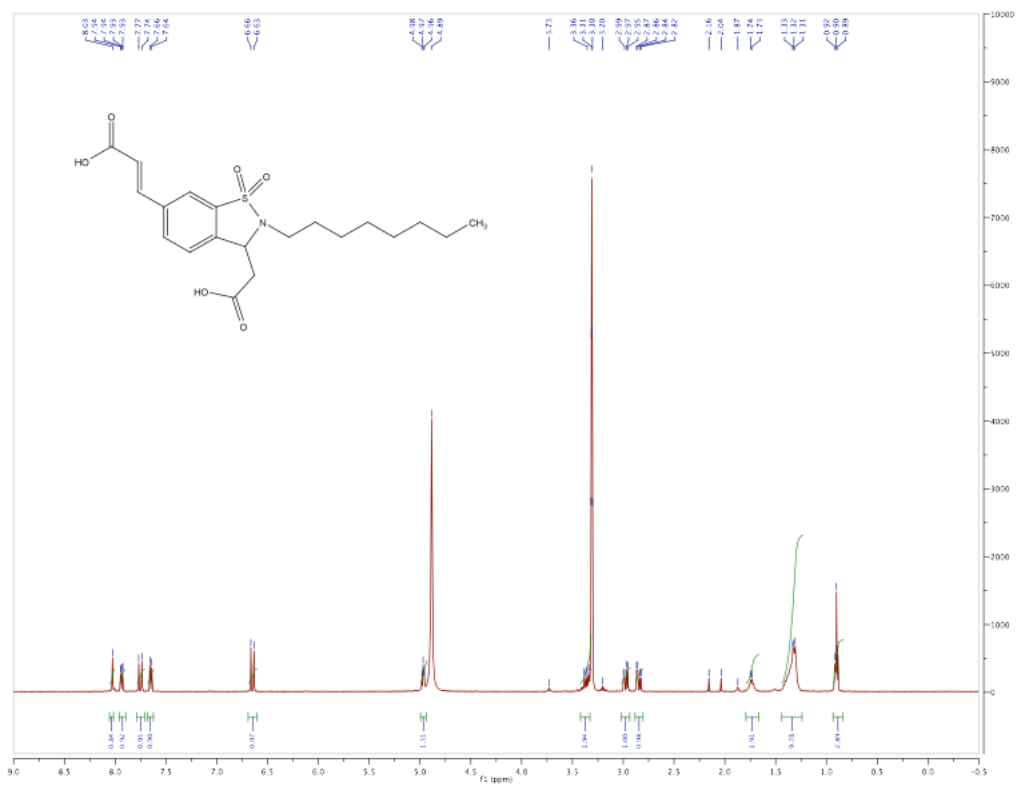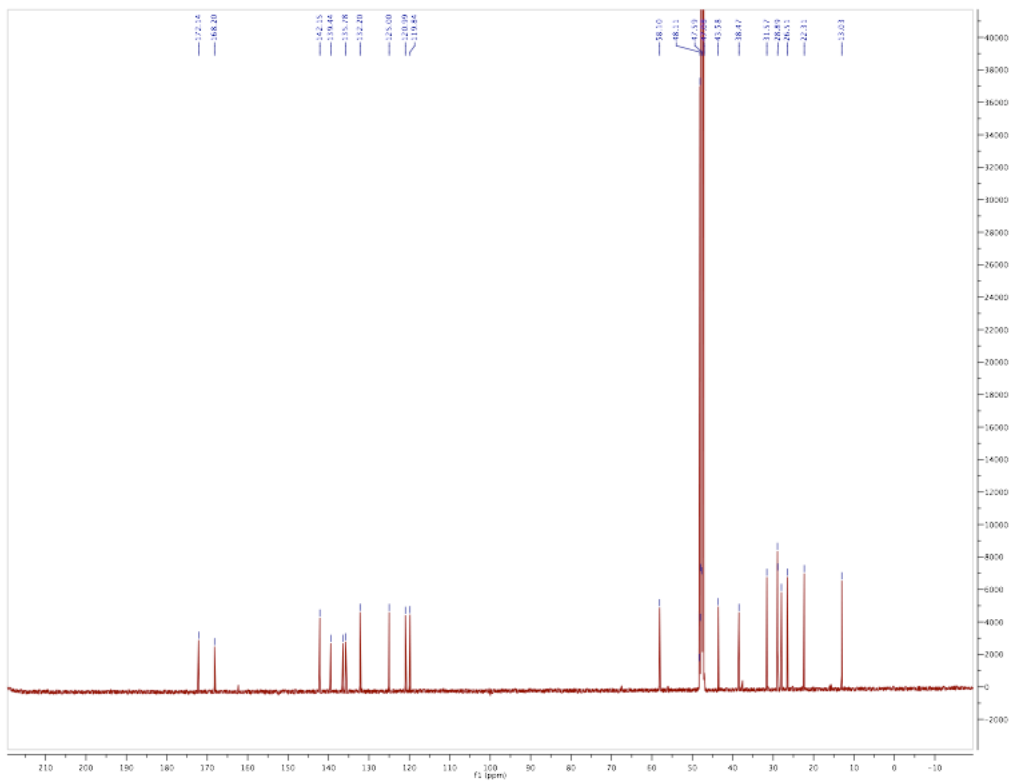

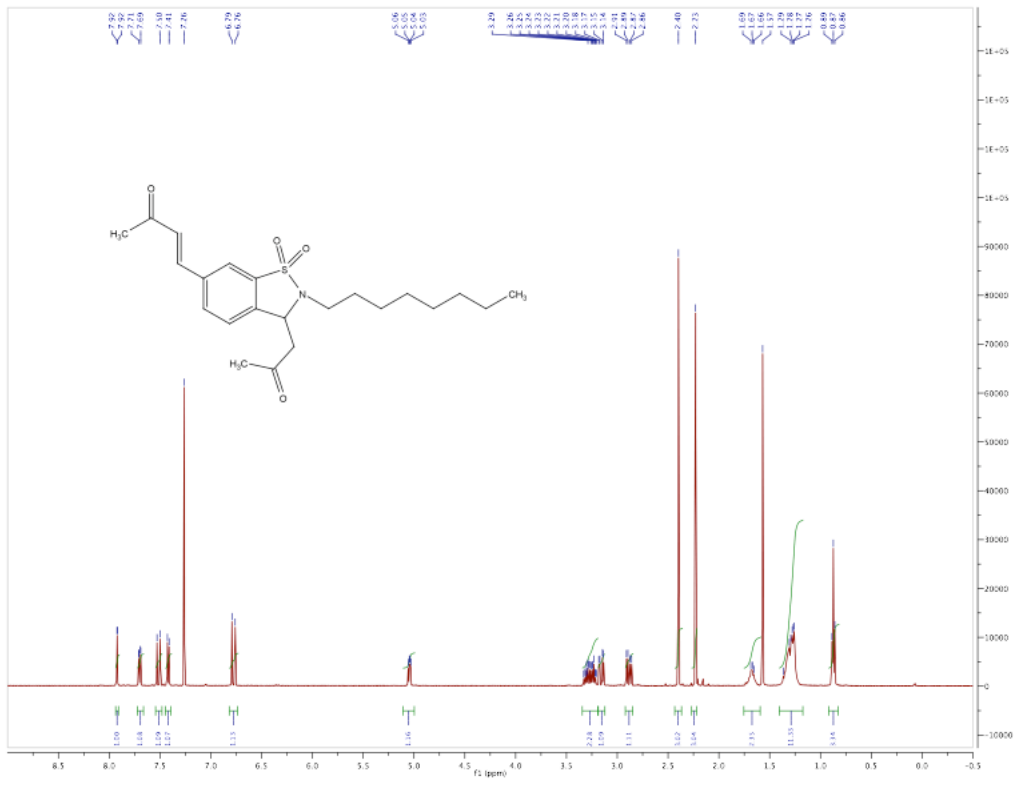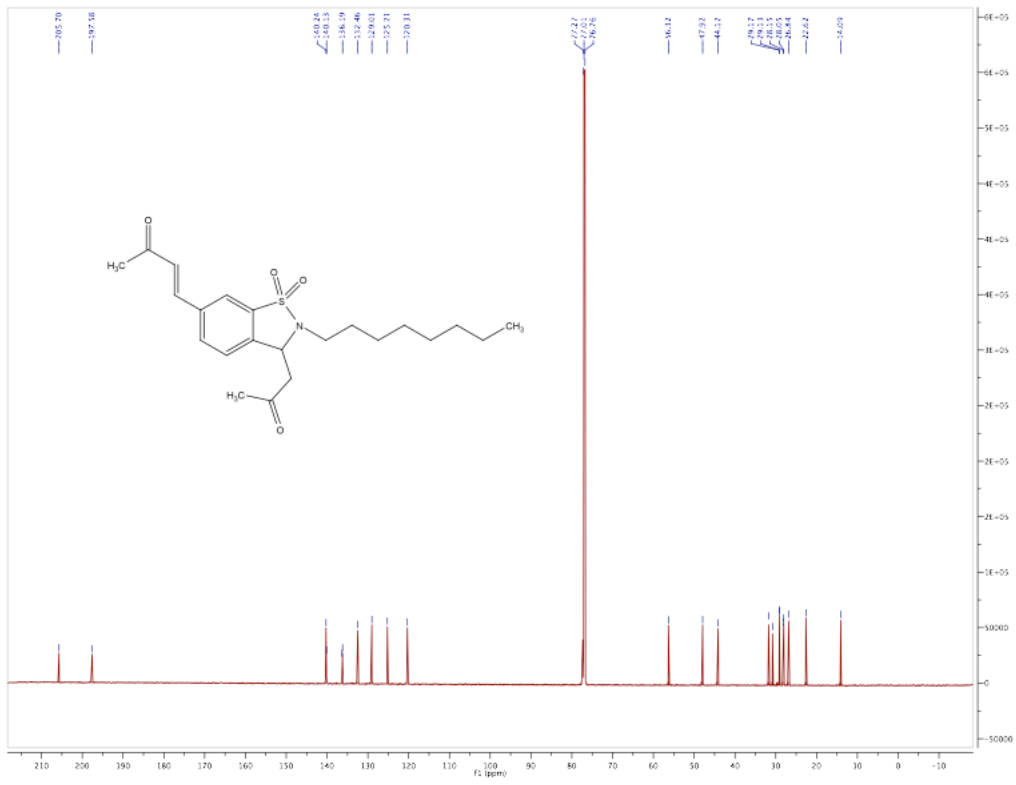

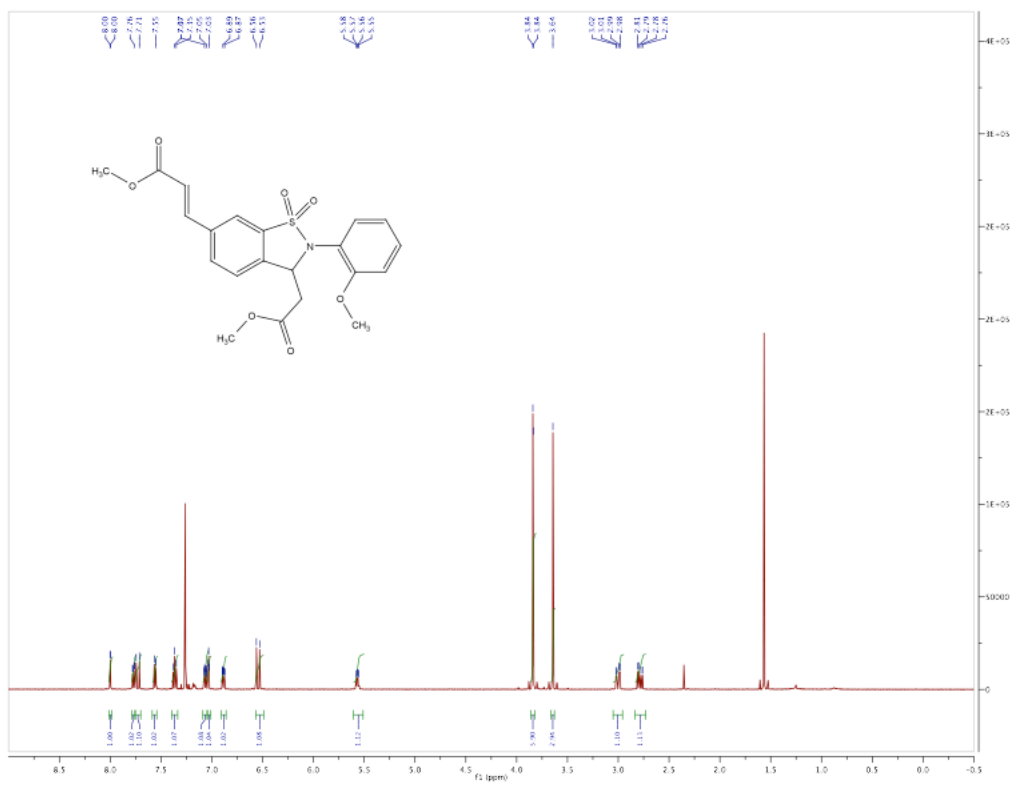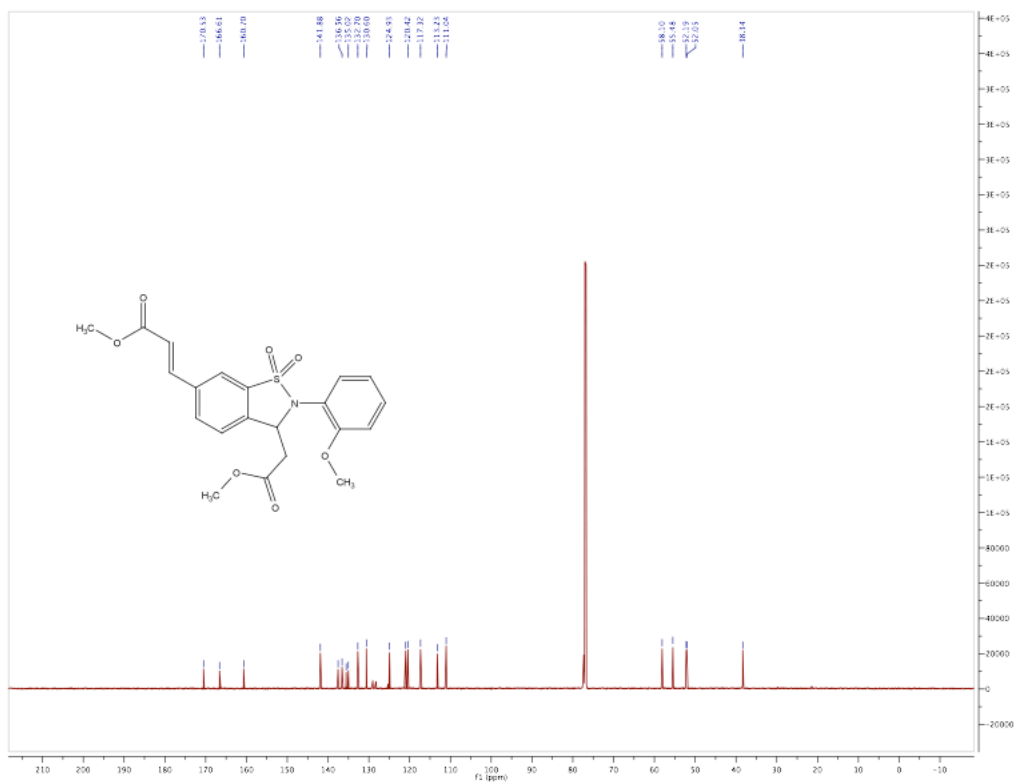

# Compound 6

Sample Report (continued):

Sample 25 Vial 3:24 ID KY-1-151-1 File AR041307L24 Date 13-Apr-2007 Time 22:03:19 Description Crude

1: TOF MS ES+ :298.111 Smooth (SG, 2x3)

2.7e+004

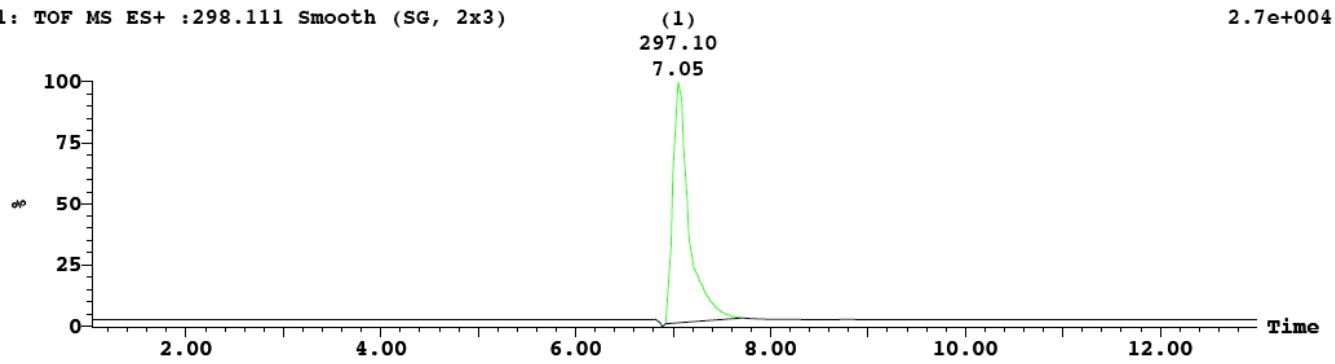

Peak ID Time  
1 7.05

Combine (233:242-176:179)

1:TOF MS ES+  
1.0e+005

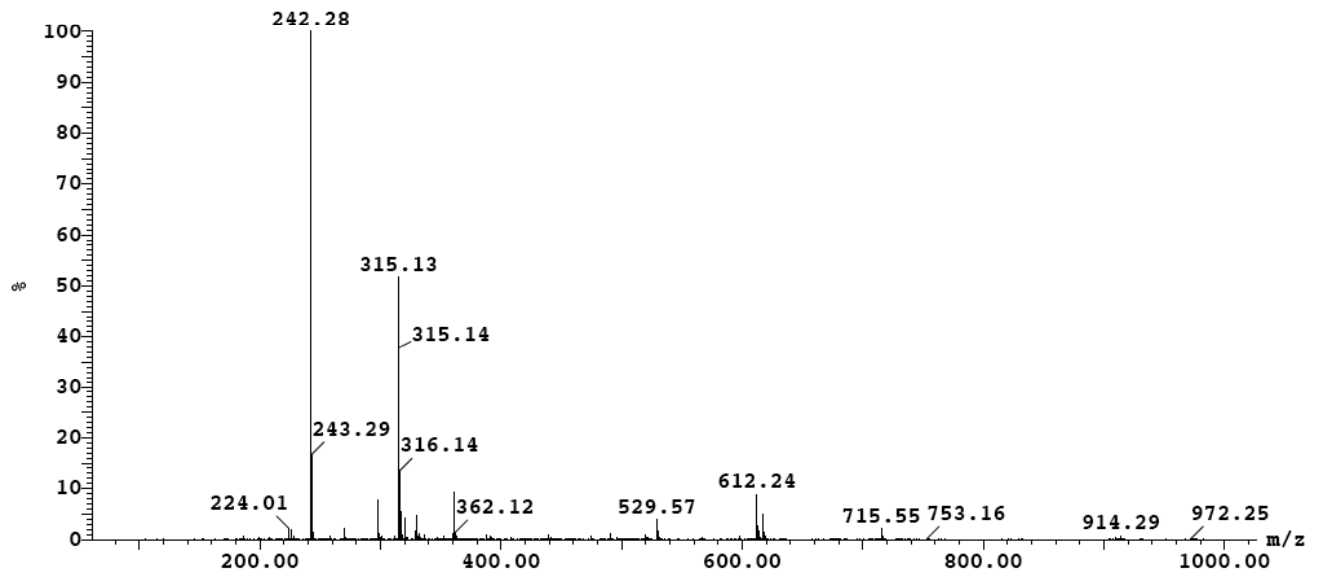

Mass  
298.1132  
298.1132



# Compound 12

Sample Report (continued):

Sample 5 Vial 3:4 ID KV-1-25-4 File AR041307L04 Date 13-Apr-2007 Time 16:36:14 Description Crude

1: TOF MS ES+ :294.116 Smooth (SG, 2x3)

1.6e+004

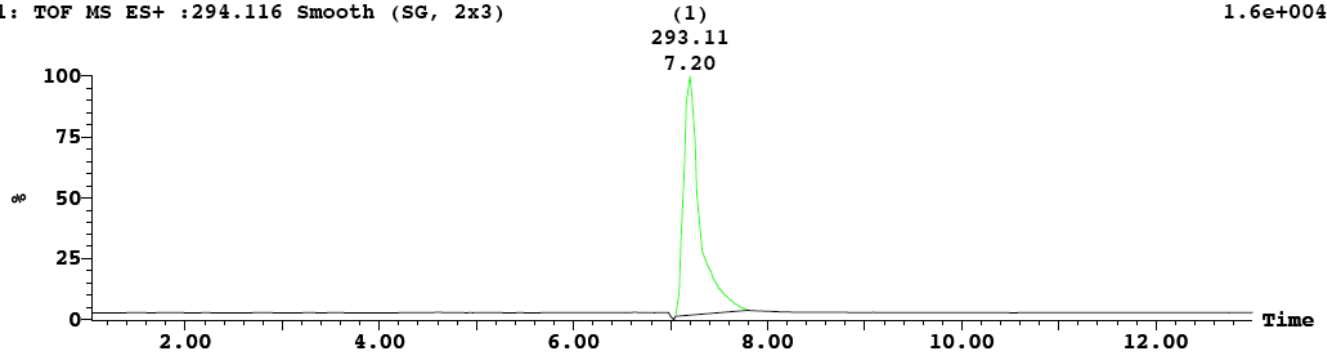

Peak ID Time  
1 7.20

Combine (236:245-181:183)

1: TOF MS ES+  
3.3e+004

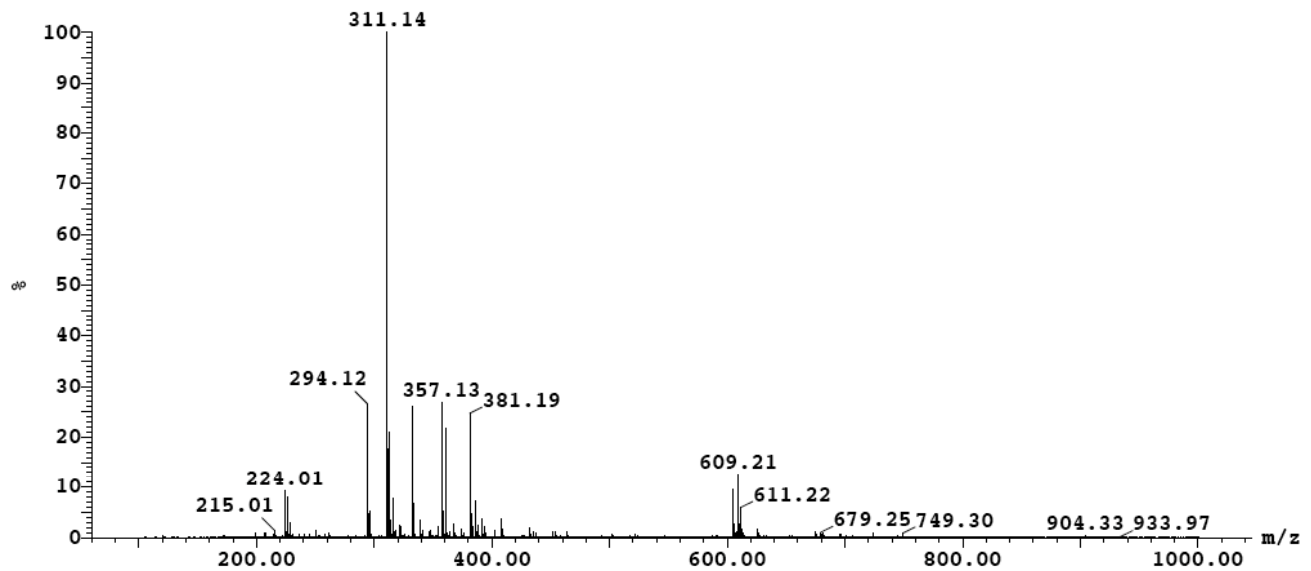

Mass  
294.1181  
294.1181  
294.1181

# Compound 14

Sample Report (continued):

Sample 6 Vial 3:5 ID KV-1-25-6 File AR041307L05 Date 13-Apr-2007 Time 16:52:33 Description Crude

1: TOF MS ES+ :302.085 Smooth (SG, 2x3)

7.0e+003

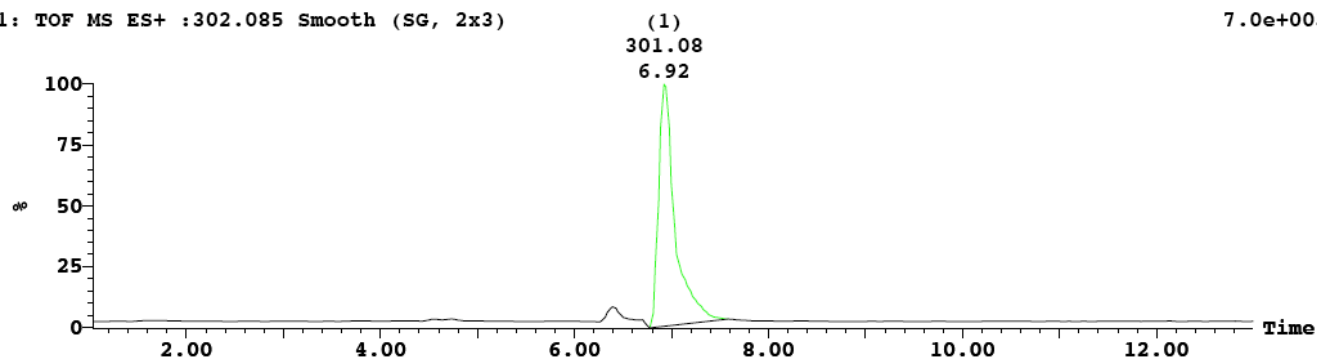

| Peak ID | Time |
|---------|------|
| 1       | 6.92 |

Combine (220:229-171:173)

1:TOF MS ES+  
8.3e+004

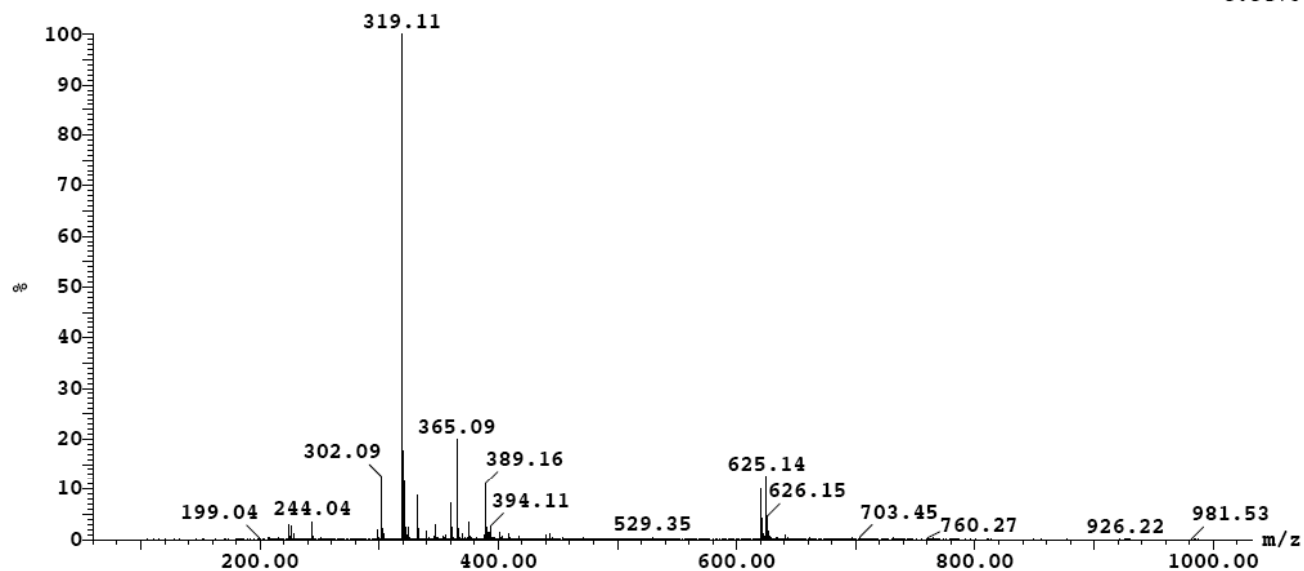

Mass  
302.0865  
302.0865  
302.0865  
302.0865  
302.0865

# Compound 24

Sample 23 Vial 3:22 ID KY-1-148-4 File AR041307L22 Date 13-Apr-2007 Time 21:30:41 Description Crude

1: TOF MS ES+ :342.118 Smooth (SG, 2x3)

1.2e+004

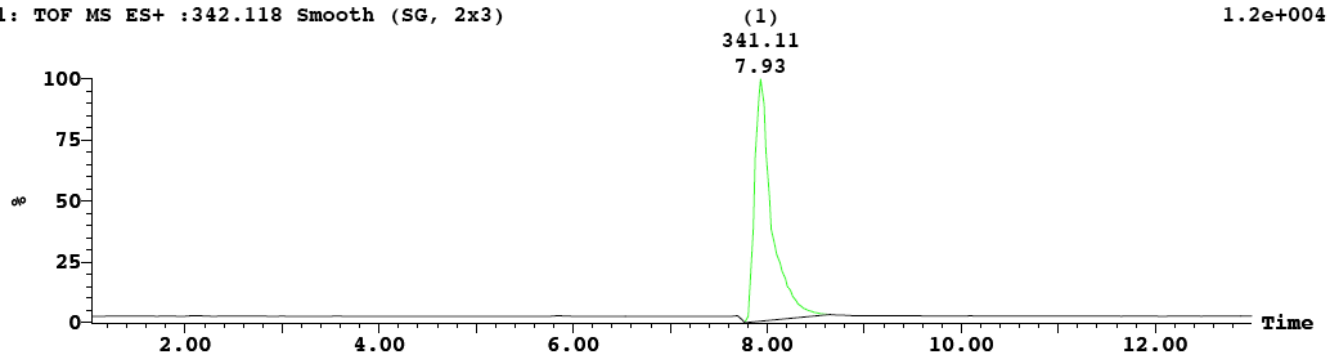

Peak ID Time  
1 7.93

Combine (261:270-207:209)

1:TOF MS ES+  
1.1e+005

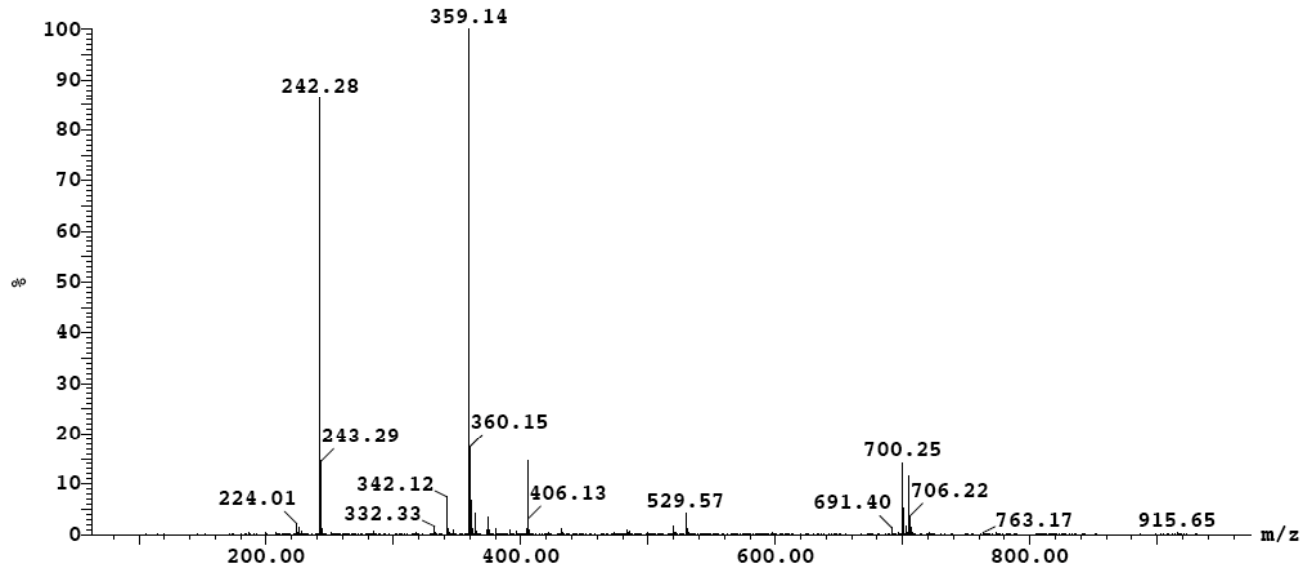

Mass  
342.1182  
342.1182

# Compound 61

Sample Report (continued):

Sample 60 Vial 4:4 ID PSL4-1-367-14 File AR080107L04 Date 02-Aug-2007 Time 06:42:48 Description MDF002836

1: TOF MS ES+ :414.099 Smooth (SG, 2x3)

1.9e+003

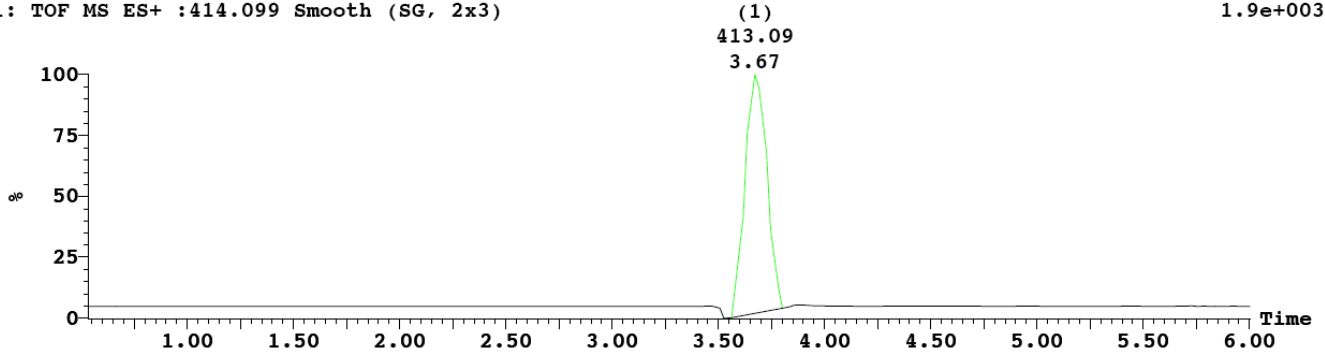

Peak ID Time  
1 3.67

Combine (115:117-35:38)

1:TOF MS ES+  
7.6e+004

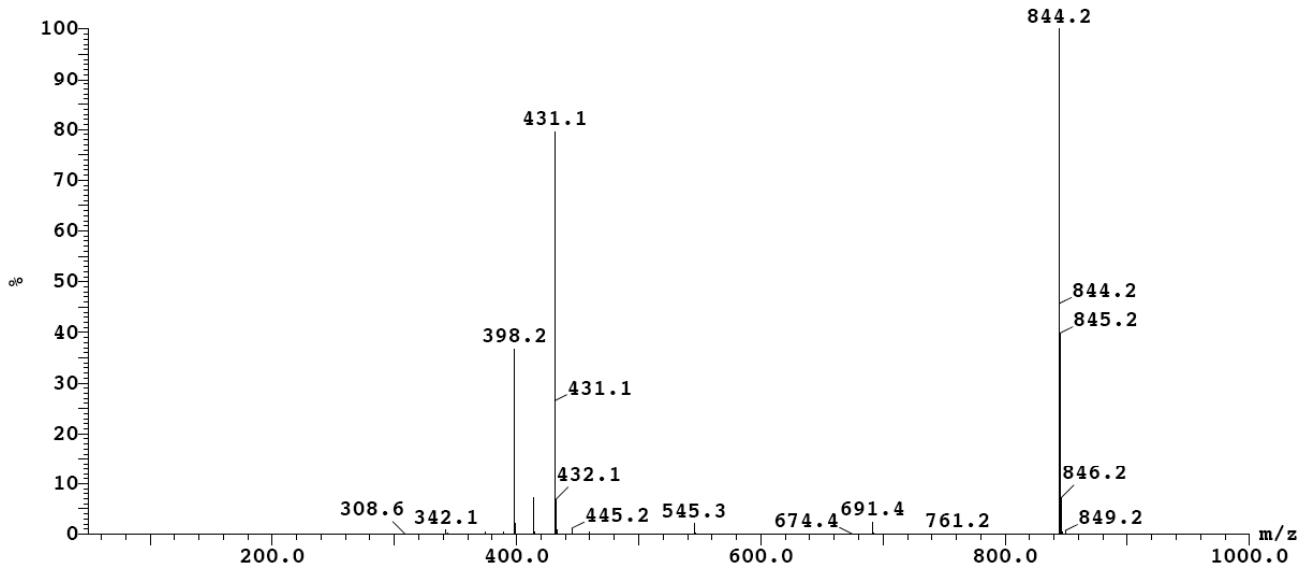

Mass  
414.1001  
414.1001  
414.1001  
414.1001  
414.1001  
414.1001  
414.1001  
414.1001  
414.1001  
414.1001

# Compound 62

## Sample Report:

Sample 57 Vial 4:1 ID PSL4-1-367-2 File AR080107L01 Date 02-Aug-2007 Time 06:14:48 Description MDF002830

1: TOF MS ES+ :436.143 Smooth (SG, 2x3)

(1)  
435.14  
3.29

1.6e+004

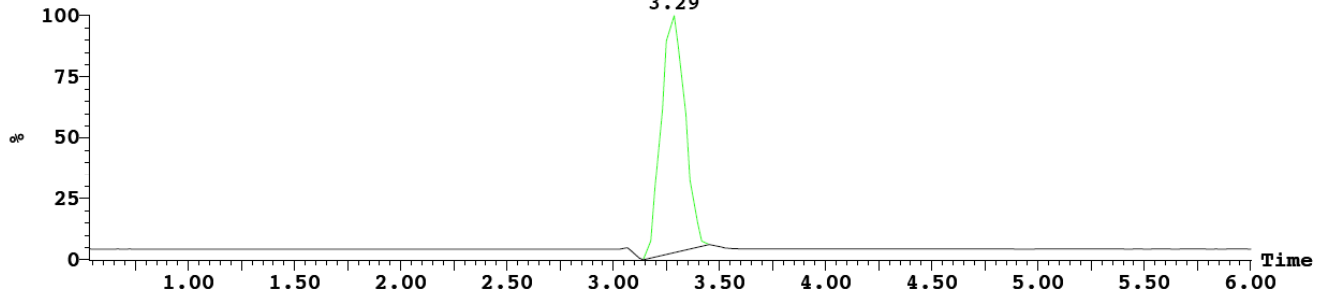

Peak ID Time  
1 3.29

Combine (105:107-19:23)

1:TOF MS ES+  
7.1e+004

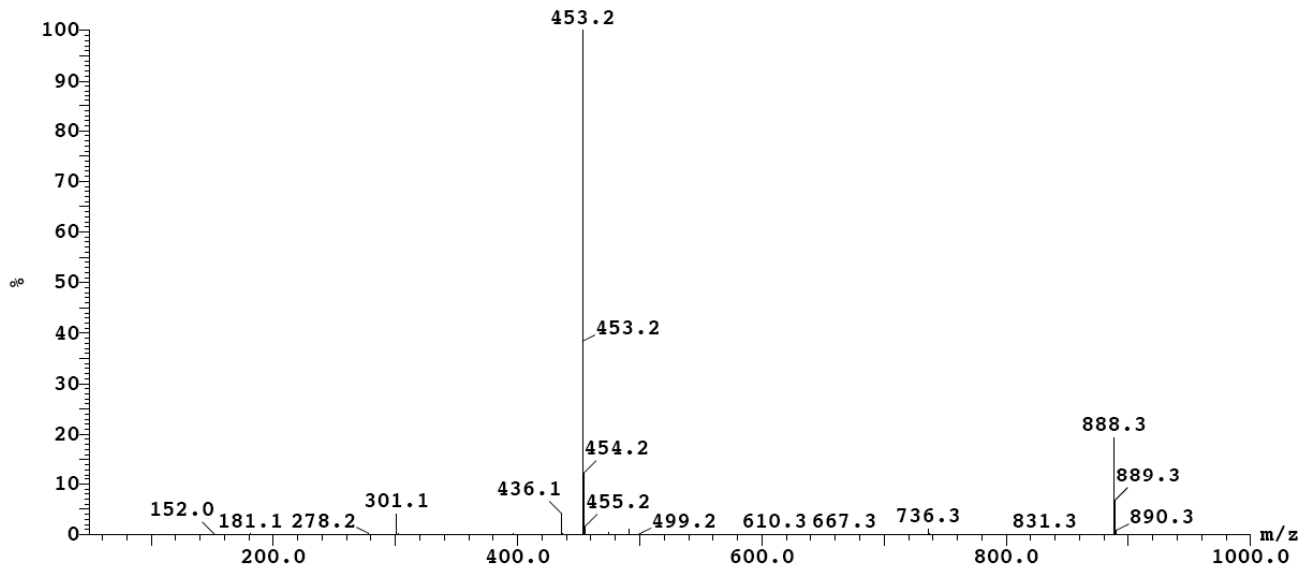

Mass  
436.1427  
436.1427  
436.1427  
436.1427  
436.1427  
436.1427  
436.1427  
436.1427  
436.1427  
436.1427

# Compound 68

## Sample Report (continued):

Sample 61 Vial 4:5 ID PSL4-1-369-2 File AR080107L05 Date 02-Aug-2007 Time 06:52:23 Description MDF002839

1: TOF MS ES+ :454.134 Smooth (SG, 2x3)

4.2e+003

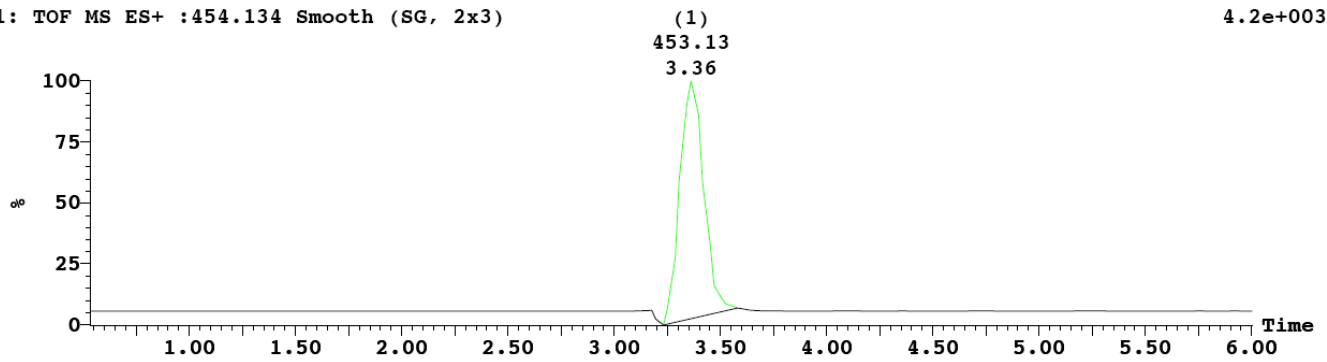

| Peak ID | Time |
|---------|------|
| 1       | 3.36 |

Combine (106:108-23:26)

1:TOF MS ES+  
1.1e+005

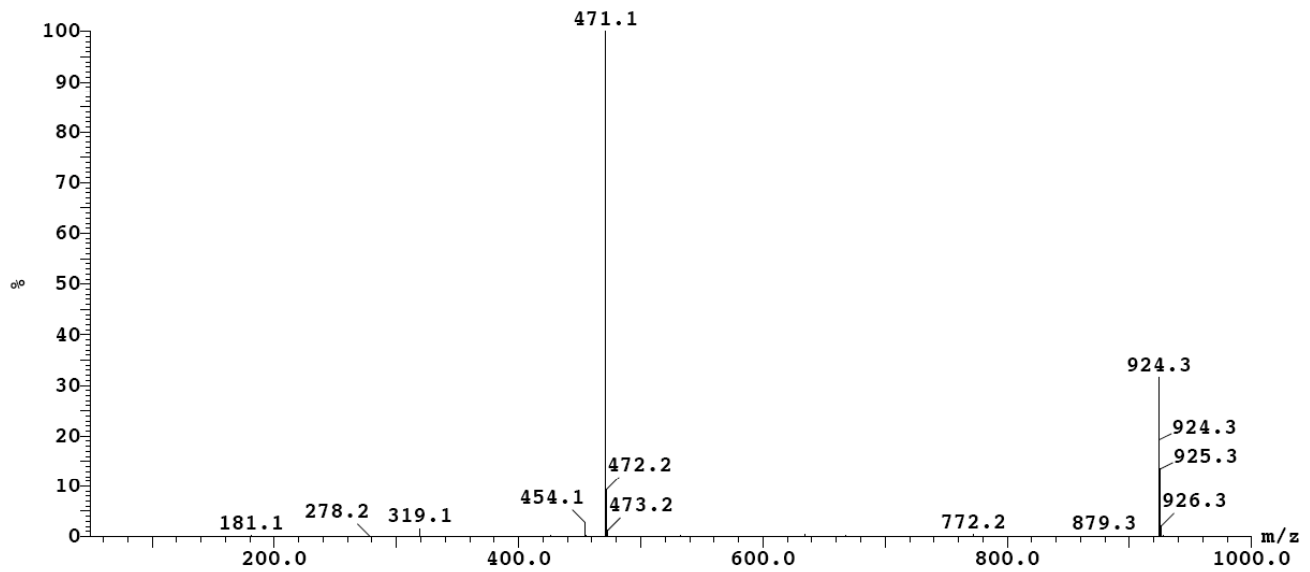

Mass  
454.1353  
454.1353  
454.1353  
454.1353  
454.1353  
454.1353  
454.1353  
454.1353  
454.1353

# Compound 85

## Sample Report (continued):

Sample 65 Vial 4:9 ID PSL4-1-373-2 File AR080107L09 Date 02-Aug-2007 Time 07:31:56 Description MDF002848

1: TOF MS ES+ :474.159 Smooth (SG, 2x3)

(1)  
473.15  
3.69

4.4e+003

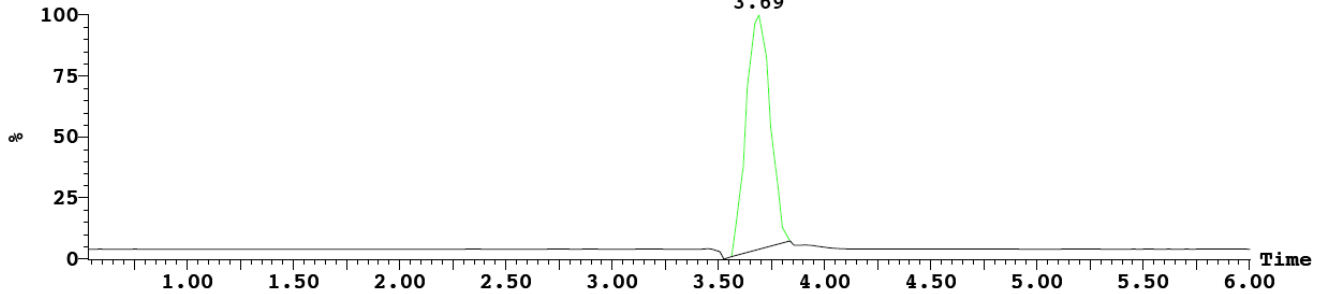

| Peak ID | Time |
|---------|------|
| 1       | 3.69 |

Combine (118:120-35:38)

1:TOF MS ES+  
2.8e+004

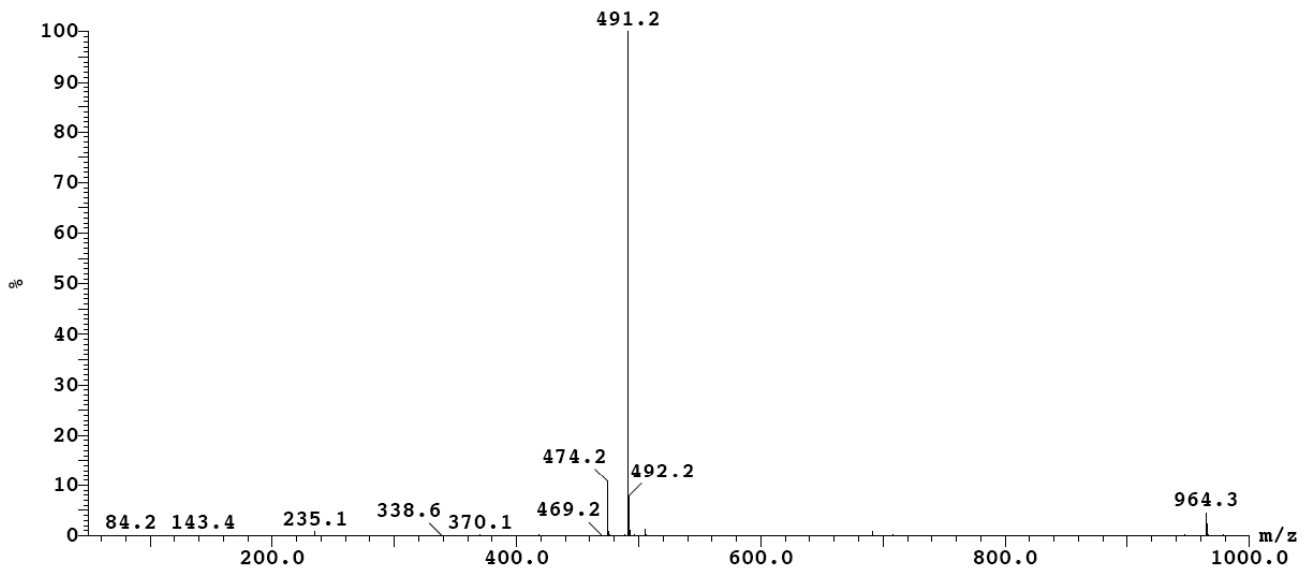

Mass  
474.1598  
474.1598  
474.1598  
474.1598  
474.1598  
474.1598  
474.1598  
474.1598  
474.1598

# Compound 86

Sample Report (continued):

Sample 66 Vial 4:10 ID PSL4-1-373-3 File AR080107L10 Date 02-Aug-2007 Time 09:25:03 Description MDF002882

1: TOF MS ES+ :418.096 Smooth (SG, 2x3)

(1)  
417.09  
2.85

7.1e+002

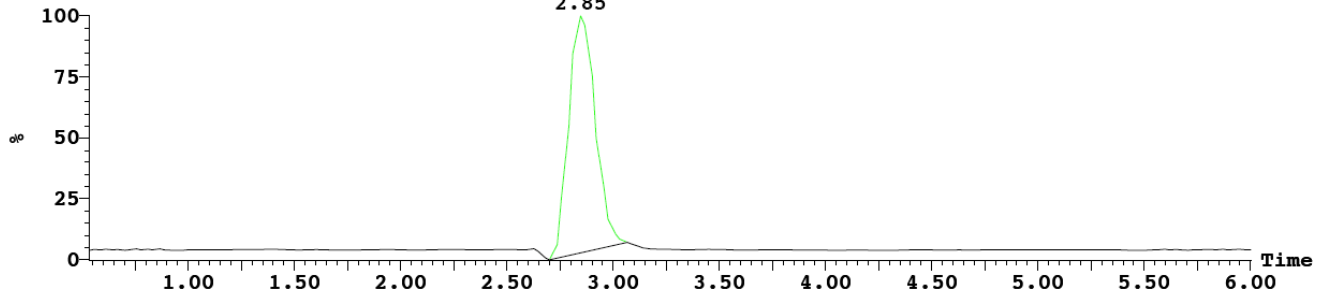

Peak ID Time  
1 2.85  
Combine (85:87-3:7)

1:TOF MS ES+  
6.3e+003

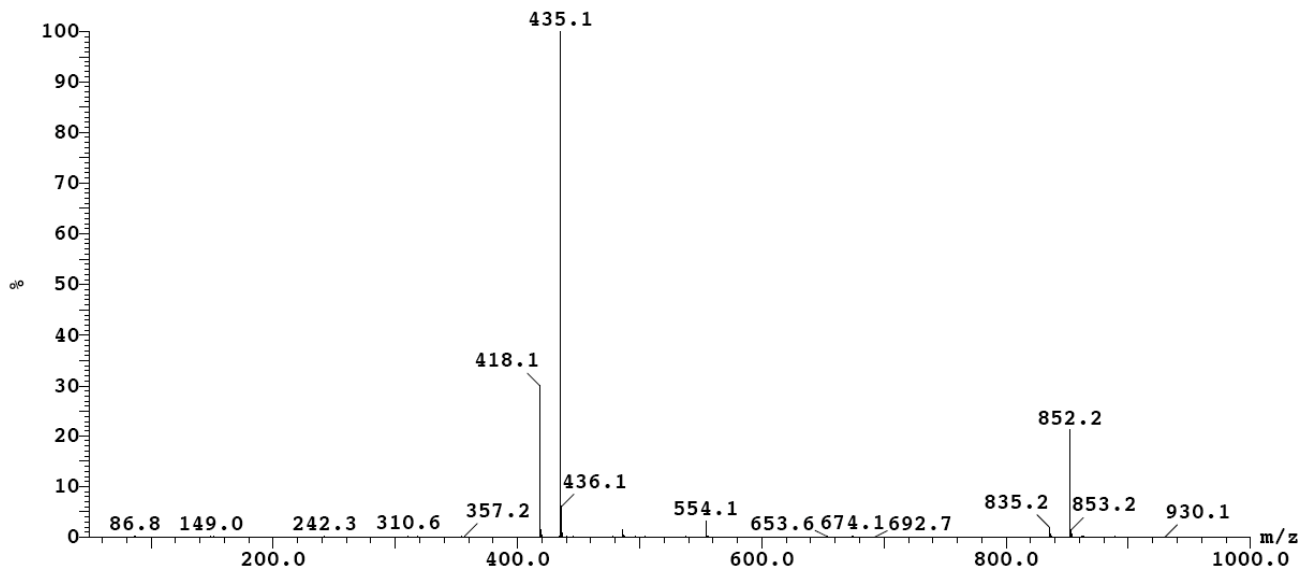

Mass  
418.0975  
418.0975  
418.0975  
418.0975  
418.0975  
418.0975  
418.0975



# Compound 89

Sample Report (continued):

Sample 73 Vial 4:17 ID PSL4-1-375-2 File AR080107L17 Date 02-Aug-2007 Time 08:29:10 Description MDF002869

1: TOF MS ES+ :466.226 Smooth (SG, 2x3)

(1)  
465.22  
4.28

7.1e+003

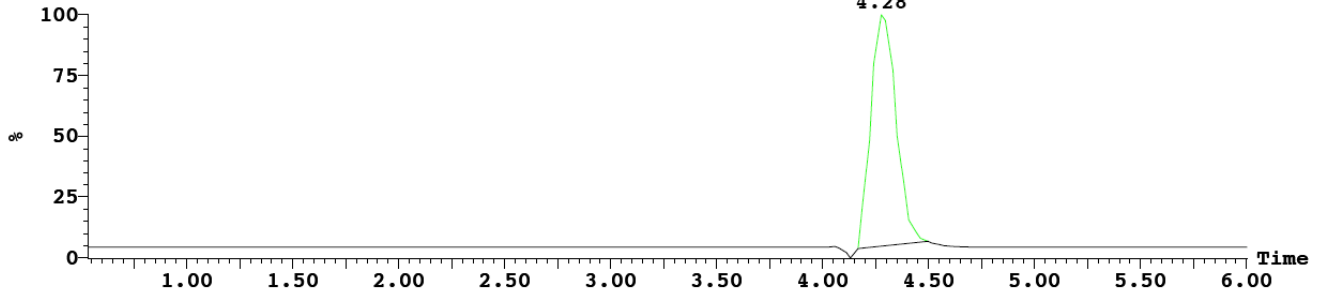

Peak ID Time  
1 4.28

Combine (140:142-57:60)

1:TOF MS ES+  
5.2e+004

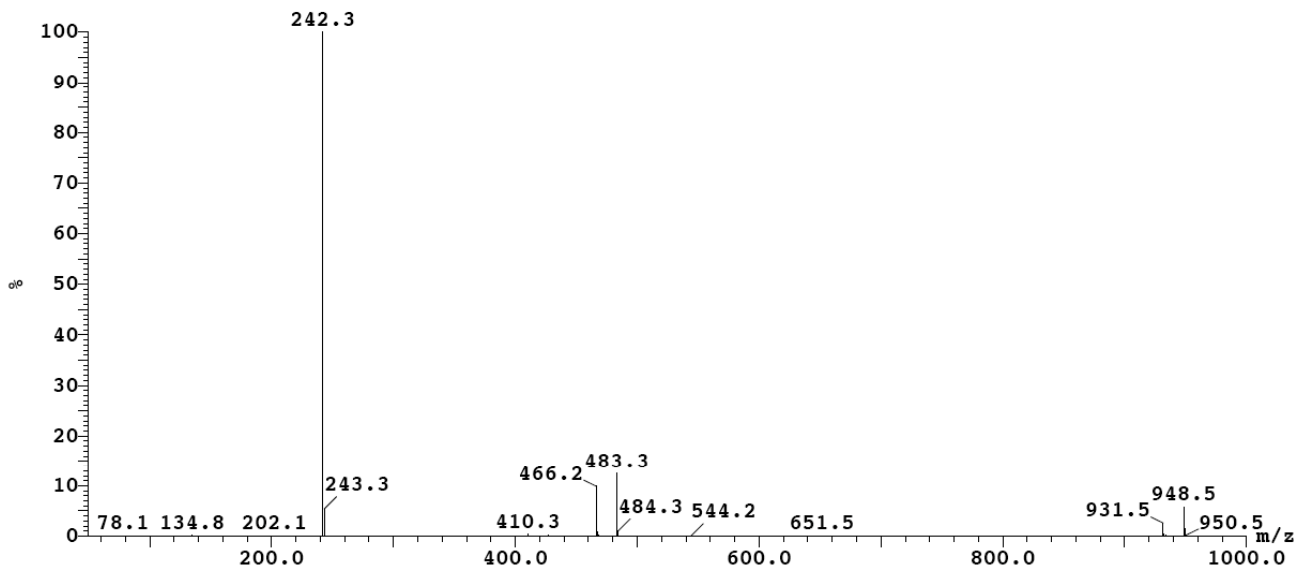

Mass  
466.2279  
466.2279  
466.2279  
466.2279  
466.2279  
466.2279  
466.2279  
466.2279  
466.2279

# Compound 92

## Sample Report (continued):

Sample 68 Vial 4:12 ID PSL4-1-374-1 File AR080107L12 Date 02-Aug-2007 Time 07:50:24 Description MDF002856

1: TOF MS ES+ :432.112 Smooth (SG, 2x3)

2.9e+003

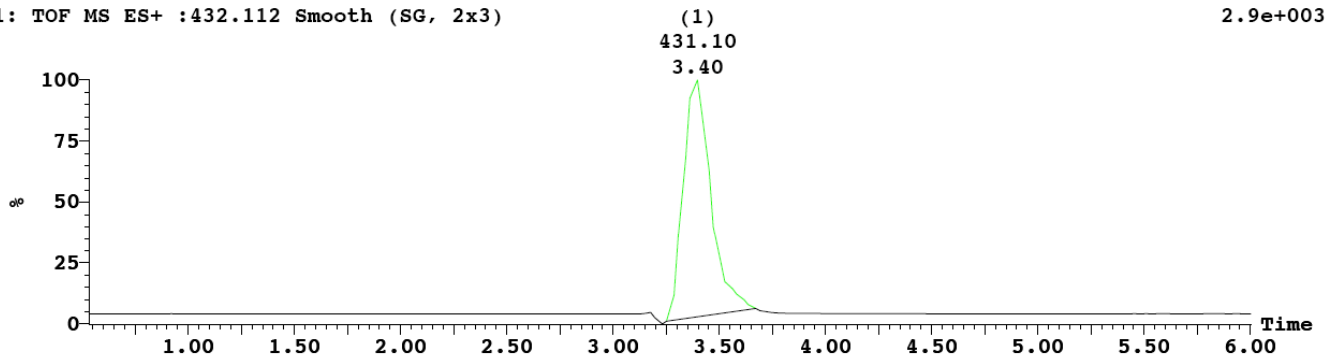

Peak ID Time  
1 3.40

Combine (106:108-23:27)

1:TOF MS ES+  
1.8e+004

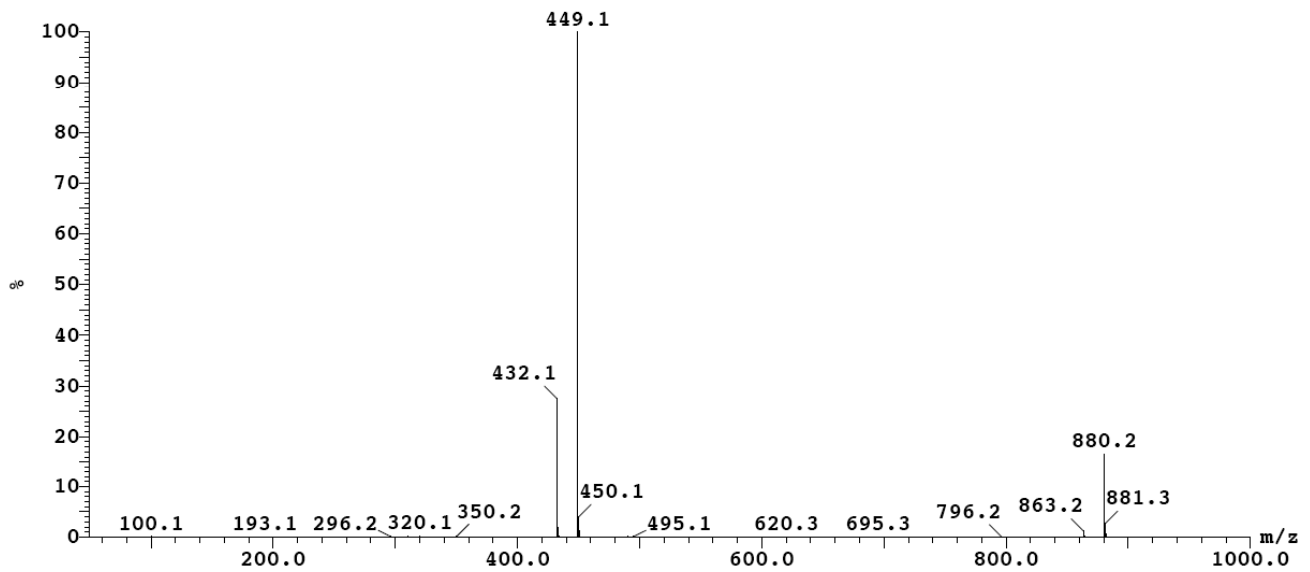

Mass  
432.1118  
432.1118  
432.1118  
432.1118  
432.1118  
432.1118  
432.1118  
432.1118  
432.1118

# Compound 93

## Sample Report (continued):

Sample 69 Vial 4:13 ID PSL4-1-374-2 File AR080107L13 Date 02-Aug-2007 Time 07:59:48 Description MDF002860

1: TOF MS ES+ :460.143 Smooth (SG, 2x3)

(1)  
459.14  
3.64

7.3e+003

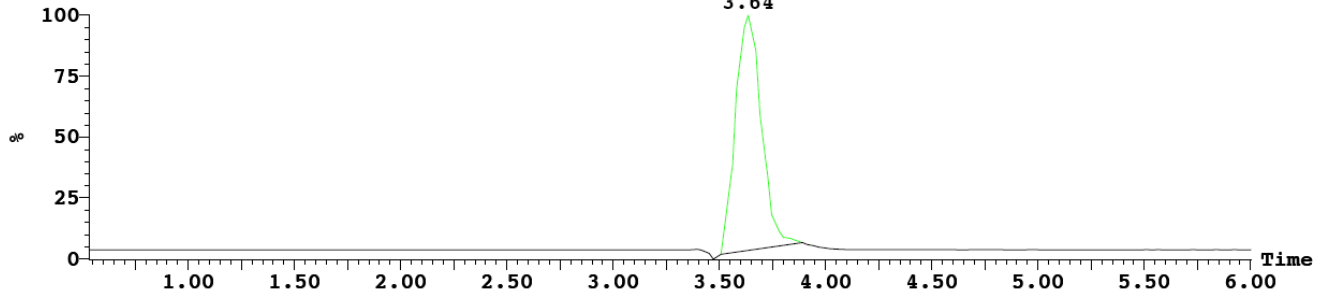

Peak ID Time  
1 3.64  
Combine (117:119-33:36)

1:TOF MS ES+  
1.9e+004

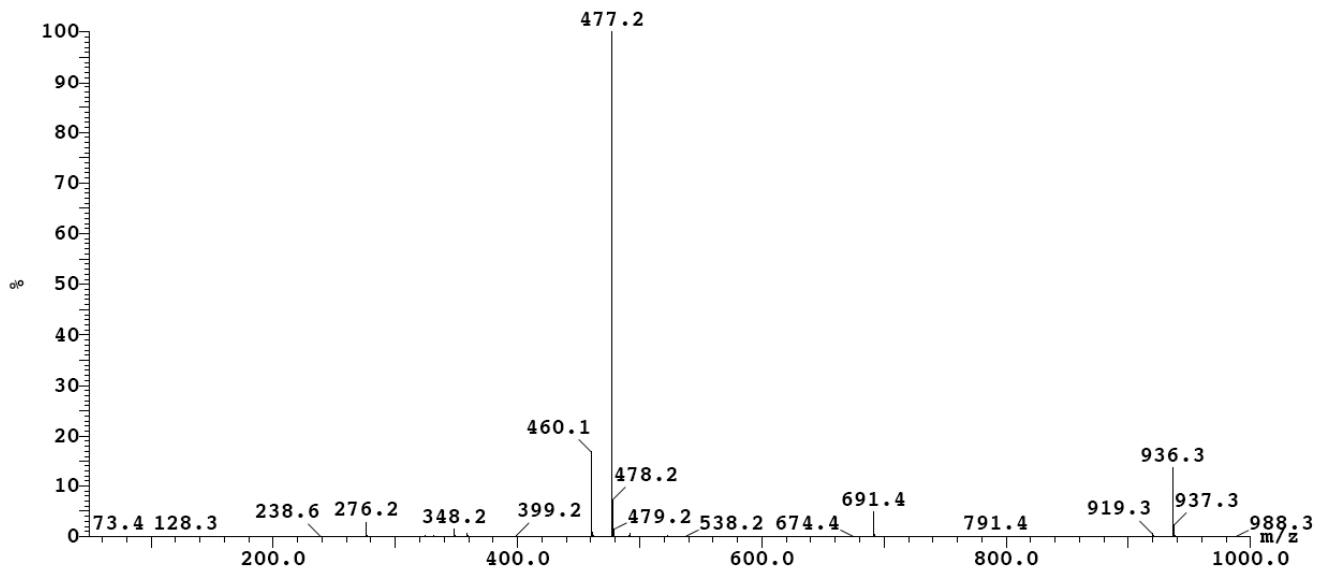

Mass  
460.1442  
460.1442  
460.1442  
460.1442  
460.1442  
460.1442  
460.1442  
460.1442  
460.1442

## Calculated Lipinski and ADME property table of all library members

| Compound | ClogP | Mol.Wt [g/mol] | No. of Hydrogen Bond Acceptors | No. of Hydrogen Bond Donors | No. of Rotatable Bonds | Lipinski Violations | Diversity | Blood Brain Barrier Permeation | Aqueous Solubility [log(mol/L)] | CACO2 [10 <sup>-6</sup> cm/s] | Solubility [log(mol/L)] | Permeability [10 <sup>-6</sup> cm/s] | Protein Binding | Volume Distribution [-logL/kg] | HERG Blockers | Solubility in DMSO | Metabolic Stability |
|----------|-------|----------------|--------------------------------|-----------------------------|------------------------|---------------------|-----------|--------------------------------|---------------------------------|-------------------------------|-------------------------|--------------------------------------|-----------------|--------------------------------|---------------|--------------------|---------------------|
| 1        | 41.00 | 2.32           | 4                              | 0                           | 4                      | 1                   | 0.67      | 0.74                           | -3.69                           | 0.97                          | 0.28                    | 0.90                                 | 72.31           | -0.28                          | 0.64          | 1.19               | 0.27                |
| 2        | 41.00 | 2.79           | 6                              | 0                           | 5                      | 1                   | 3.42      | 0.61                           | -4.46                           | 1.08                          | -0.11                   | 1.00                                 | 90.14           | -0.58                          | 0.47          | 0.93               | -0.29               |
| 3        | 42.00 | 3.04           | 5                              | 0                           | 6                      | 2                   | 3.42      | 0.01                           | -4.39                           | 0.76                          | -0.15                   | 0.81                                 | 86.17           | -0.56                          | 0.28          | 1.09               | -0.10               |
| 4        | 41.00 | 3.37           | 5                              | 0                           | 5                      | 1                   | 3.42      | 0.50                           | -4.38                           | 0.98                          | -0.06                   | 0.96                                 | 89.68           | -0.54                          | 0.70          | 1.25               | -0.10               |
| 5        | 41.00 | 3.39           | 6                              | 0                           | 6                      | 2                   | 3.42      | 0.42                           | -4.15                           | 0.76                          | -0.07                   | 0.89                                 | 90.76           | -0.70                          | 0.79          | 0.83               | -0.12               |
| 6        | 42.00 | 3.57           | 5                              | 0                           | 7                      | 2                   | 3.42      | 0.24                           | -4.73                           | 0.86                          | -0.30                   | 0.86                                 | 87.91           | -0.60                          | 0.18          | 0.72               | -0.30               |
| 7        | 41.00 | 2.40           | 4                              | 0                           | 4                      | 1                   | 3.42      | 0.49                           | -3.57                           | 0.48                          | 0.40                    | 0.47                                 | 71.16           | -0.03                          | 0.79          | 1.80               | 0.35                |
| 8        | 41.00 | 2.96           | 4                              | 0                           | 4                      | 1                   | 3.42      | 0.42                           | -3.54                           | 0.42                          | 0.34                    | 0.48                                 | 66.08           | -0.07                          | 0.74          | 1.89               | 0.41                |
| 9        | 41.00 | 2.38           | 5                              | 0                           | 4                      | 1                   | 3.42      | 0.31                           | -3.63                           | 0.69                          | 0.22                    | 0.73                                 | 80.56           | -0.24                          | 0.87          | 1.87               | 0.40                |
| 10       | 41.00 | 2.40           | 6                              | 0                           | 5                      | 1                   | 3.42      | 0.05                           | -4.04                           | 0.51                          | 0.09                    | 0.52                                 | 83.37           | -0.18                          | 0.85          | 1.79               | 0.42                |
| 11       | 42.00 | 2.58           | 5                              | 0                           | 6                      | 2                   | 3.42      | -0.32                          | -3.99                           | 0.40                          | 0.05                    | 0.46                                 | 80.61           | -0.40                          | 0.31          | 1.71               | 0.26                |
| 12       | 41.00 | 2.56           | 3                              | 0                           | 3                      | 1                   | 3.42      | 0.51                           | -4.02                           | 0.96                          | 0.22                    | 0.86                                 | 74.46           | -0.41                          | 0.61          | 1.23               | -0.03               |
| 13       | 41.00 | 3.12           | 3                              | 0                           | 3                      | 1                   | 3.42      | 0.66                           | -4.15                           | 0.95                          | 0.14                    | 0.87                                 | 79.50           | -0.55                          | 0.65          | 0.84               | -0.22               |
| 14       | 41.00 | 2.54           | 4                              | 0                           | 3                      | 1                   | 3.42      | 0.66                           | -3.93                           | 1.07                          | 0.05                    | 1.02                                 | 85.80           | -0.39                          | 0.66          | 1.24               | 0.16                |
| 15       | 41.00 | 2.49           | 5                              | 0                           | 4                      | 1                   | 3.42      | 0.39                           | -4.53                           | 0.89                          | 0.02                    | 0.79                                 | 82.38           | -0.37                          | 0.18          | 1.30               | -0.30               |
| 16       | 41.00 | 2.46           | 4                              | 0                           | 4                      | 1                   | 0.67      | 0.51                           | -3.80                           | 0.69                          | 0.38                    | 0.74                                 | 72.78           | -0.31                          | 0.82          | 1.24               | 0.19                |
| 17       | 41.00 | 2.86           | 4                              | 0                           | 4                      | 1                   | 3.42      | 0.47                           | -3.88                           | 0.67                          | 0.33                    | 0.74                                 | 75.30           | -0.31                          | 0.85          | 1.33               | 0.11                |
| 18       | 41.00 | 2.98           | 5                              | 0                           | 4                      | 1                   | 3.42      | 0.23                           | -4.36                           | 0.70                          | 0.10                    | 0.80                                 | 86.53           | -0.45                          | 0.71          | 1.44               | 0.03                |
| 19       | 42.00 | 3.19           | 5                              | 0                           | 6                      | 2                   | 3.42      | -0.31                          | -4.60                           | 0.49                          | -0.08                   | 0.69                                 | 91.10           | -0.56                          | 0.53          | 1.23               | 0.01                |
| 20       | 42.00 | 3.27           | 4                              | 0                           | 5                      | 1                   | 3.42      | 0.11                           | -4.38                           | 0.58                          | 0.07                    | 0.78                                 | 90.55           | -0.44                          | 0.58          | 1.31               | -0.08               |
| 21       | 41.00 | 5.33           | 4                              | 0                           | 10                     | 2                   | 3.42      | -0.14                          | -5.28                           | 0.56                          | -0.13                   | 0.76                                 | 93.24           | -0.41                          | 0.44          | 1.34               | -0.56               |
| 22       | 41.00 | 2.99           | 4                              | 0                           | 5                      | 1                   | 3.42      | 0.44                           | -4.02                           | 0.72                          | 0.29                    | 0.74                                 | 74.19           | -0.30                          | 0.78          | 1.18               | 0.03                |
| 23       | 41.00 | 3.39           | 4                              | 0                           | 5                      | 1                   | 3.42      | 0.41                           | -3.96                           | 0.66                          | 0.24                    | 0.78                                 | 76.24           | -0.37                          | 0.93          | 1.33               | -0.03               |
| 24       | 41.00 | 3.53           | 4                              | 0                           | 5                      | 1                   | 3.42      | 0.33                           | -4.50                           | 0.70                          | 0.04                    | 0.81                                 | 77.97           | -0.45                          | 0.86          | 1.31               | -0.18               |
| 25       | 41.00 | 4.09           | 4                              | 0                           | 5                      | 1                   | 3.42      | 0.35                           | -4.54                           | 0.60                          | 0.06                    | 0.71                                 | 79.23           | -0.32                          | 0.50          | 1.28               | -0.17               |
| 26       | 41.00 | 3.51           | 5                              | 0                           | 5                      | 1                   | 3.42      | 0.23                           | -4.58                           | 0.71                          | 0.00                    | 0.85                                 | 88.36           | -0.52                          | 0.68          | 1.38               | -0.07               |
| 27       | 41.00 | 3.54           | 6                              | 0                           | 6                      | 2                   | 3.42      | -0.07                          | -4.83                           | 0.51                          | -0.11                   | 0.60                                 | 89.90           | -0.38                          | 0.61          | 1.34               | 0.04                |
| 28       | 42.00 | 3.72           | 5                              | 0                           | 7                      | 2                   | 3.42      | -0.38                          | -4.70                           | 0.50                          | -0.19                   | 0.70                                 | 89.18           | -0.61                          | 0.48          | 1.17               | -0.13               |
| 29       | 42.00 | 3.80           | 4                              | 0                           | 6                      | 2                   | 3.42      | 0.04                           | -4.48                           | 0.59                          | -0.04                   | 0.78                                 | 87.91           | -0.49                          | 0.51          | 1.23               | -0.23               |
| 30       | 41.00 | 5.85           | 4                              | 0                           | 11                     | 2                   | 3.42      | -0.16                          | -5.50                           | 0.57                          | -0.23                   | 0.77                                 | 94.51           | -0.46                          | 0.36          | 1.27               | -0.69               |
| 31       | 41.00 | 2.54           | 4                              | 0                           | 4                      | 1                   | 3.42      | 0.26                           | -3.71                           | 0.09                          | 0.46                    | 0.20                                 | 73.70           | 0.00                           | 0.97          | 1.90               | 0.43                |
| 32       | 41.00 | 3.10           | 4                              | 0                           | 4                      | 1                   | 3.42      | 0.20                           | -3.70                           | 0.07                          | 0.40                    | 0.26                                 | 67.76           | 0.00                           | 0.97          | 2.04               | 0.48                |
| 33       | 41.00 | 2.52           | 5                              | 0                           | 4                      | 1                   | 3.42      | -0.02                          | -3.92                           | 0.33                          | 0.29                    | 0.53                                 | 84.13           | -0.29                          | 0.97          | 1.94               | 0.40                |
| 34       | 42.00 | 2.72           | 5                              | 0                           | 6                      | 2                   | 3.42      | -0.63                          | -4.22                           | 0.07                          | 0.12                    | 0.30                                 | 84.80           | -0.39                          | 0.50          | 1.83               | 0.39                |
| 35       | 42.00 | 2.80           | 4                              | 0                           | 5                      | 1                   | 3.42      | -0.30                          | -3.90                           | 0.16                          | 0.28                    | 0.33                                 | 84.79           | -0.30                          | 0.56          | 1.90               | 0.38                |
| 36       | 41.00 | 4.86           | 4                              | 0                           | 10                     | 2                   | 3.42      | -0.57                          | -4.87                           | 0.15                          | 0.03                    | 0.36                                 | 86.23           | -0.23                          | 0.37          | 2.04               | -0.14               |
| 37       | 41.00 | 3.20           | 4                              | 0                           | 5                      | 1                   | 3.42      | 0.37                           | -4.44                           | 0.29                          | 0.34                    | 0.50                                 | 81.41           | -0.40                          | 0.75          | 1.06               | -0.01               |
| 38       | 41.00 | 3.60           | 4                              | 0                           | 5                      | 1                   | 3.42      | 0.38                           | -4.72                           | 0.34                          | 0.21                    | 0.52                                 | 83.61           | -0.37                          | 0.60          | 1.12               | -0.08               |
| 39       | 41.00 | 3.74           | 4                              | 0                           | 5                      | 1                   | 3.42      | -0.12                          | -4.48                           | 0.26                          | 0.19                    | 0.38                                 | 81.52           | -0.08                          | 0.30          | 1.97               | 0.05                |
| 40       | 41.00 | 4.30           | 4                              | 0                           | 5                      | 1                   | 3.42      | -0.20                          | -5.06                           | 0.34                          | 0.13                    | 0.48                                 | 89.94           | -0.41                          | 0.28          | 1.64               | -0.23               |
| 41       | 42.00 | 3.93           | 5                              | 0                           | 7                      | 2                   | 3.42      | -0.43                          | -5.01                           | 0.17                          | -0.18                   | 0.60                                 | 98.34           | -0.68                          | 0.55          | 1.26               | 0.02                |
| 42       | 42.00 | 4.01           | 4                              | 0                           | 6                      | 2                   | 3.42      | -0.06                          | -4.65                           | 0.24                          | 0.00                    | 0.68                                 | 96.56           | -0.54                          | 0.66          | 1.47               | -0.01               |

|    |       |      |   |   |    |   |      |       |       |       |       |       |        |       |       |      |       |
|----|-------|------|---|---|----|---|------|-------|-------|-------|-------|-------|--------|-------|-------|------|-------|
| 43 | 41.00 | 6.07 | 4 | 0 | 11 | 2 | 3.42 | -0.34 | -5.69 | 0.20  | -0.18 | 0.62  | 102.75 | -0.50 | 0.49  | 1.59 | -0.56 |
| 44 | 41.00 | 2.99 | 4 | 0 | 5  | 1 | 3.42 | 0.44  | -4.02 | 0.72  | 0.29  | 0.74  | 74.19  | -0.30 | 0.78  | 1.18 | 0.03  |
| 45 | 41.00 | 4.27 | 4 | 0 | 6  | 2 | 3.42 | 0.07  | -4.88 | 0.41  | 0.09  | 0.54  | 85.32  | -0.40 | 0.49  | 1.29 | -0.23 |
| 46 | 41.00 | 4.83 | 4 | 0 | 6  | 2 | 3.42 | -0.16 | -5.30 | 0.37  | 0.04  | 0.49  | 89.49  | -0.40 | 0.23  | 1.53 | -0.37 |
| 47 | 41.00 | 4.28 | 6 | 0 | 7  | 2 | 3.42 | 0.14  | -5.06 | 0.27  | -0.18 | 0.58  | 97.90  | -0.44 | 0.52  | 1.09 | 0.01  |
| 48 | 42.00 | 4.46 | 5 | 0 | 8  | 2 | 3.42 | -0.47 | -5.13 | 0.20  | -0.29 | 0.61  | 96.55  | -0.72 | 0.49  | 1.18 | -0.13 |
| 49 | 42.00 | 4.54 | 4 | 0 | 7  | 2 | 3.42 | -0.11 | -4.76 | 0.26  | -0.11 | 0.69  | 94.38  | -0.59 | 0.60  | 1.39 | -0.16 |
| 50 | 41.00 | 6.59 | 4 | 0 | 12 | 2 | 3.42 | -0.37 | -5.86 | 0.21  | -0.28 | 0.61  | 102.56 | -0.55 | 0.41  | 1.46 | -0.72 |
| 51 | 41.00 | 3.14 | 4 | 0 | 5  | 1 | 3.42 | 0.03  | -4.28 | -0.17 | 0.44  | 0.00  | 72.08  | -0.12 | 0.82  | 1.65 | 0.15  |
| 52 | 41.00 | 3.28 | 4 | 0 | 5  | 1 | 3.42 | -0.03 | -4.12 | -0.10 | 0.30  | 0.10  | 74.41  | -0.15 | 0.74  | 1.91 | 0.31  |
| 53 | 41.00 | 3.84 | 4 | 0 | 5  | 1 | 3.42 | -0.11 | -4.54 | -0.08 | 0.31  | -0.01 | 75.38  | 0.01  | 0.44  | 1.99 | 0.32  |
| 54 | 42.00 | 3.46 | 5 | 0 | 7  | 2 | 3.42 | -0.77 | -4.64 | -0.21 | 0.02  | 0.19  | 92.32  | -0.51 | 0.56  | 1.79 | 0.43  |
| 55 | 42.00 | 3.54 | 4 | 0 | 6  | 2 | 3.42 | -0.48 | -4.18 | -0.15 | 0.21  | 0.25  | 91.82  | -0.42 | 0.70  | 2.05 | 0.48  |
| 56 | 41.00 | 5.60 | 4 | 0 | 11 | 2 | 3.42 | -0.89 | -5.18 | -0.19 | 0.00  | 0.20  | 96.58  | -0.40 | 0.51  | 2.23 | -0.11 |
| 57 | 41.00 | 3.01 | 6 | 1 | 5  | 1 | 3.42 | 0.69  | -4.26 | 0.74  | -0.07 | 0.86  | 82.85  | -0.38 | 0.51  | 0.96 | -0.23 |
| 58 | 41.00 | 3.82 | 3 | 1 | 6  | 2 | 3.42 | -0.49 | -6.10 | 0.27  | -0.53 | 0.48  | 115.67 | -0.56 | 0.16  | 1.33 | -0.48 |
| 59 | 42.00 | 2.84 | 7 | 0 | 9  | 2 | 3.42 | -0.90 | -4.83 | -0.33 | -0.08 | 0.13  | 93.74  | -0.60 | 0.78  | 1.68 | 0.20  |
| 60 | 51.00 | 7.83 | 4 | 0 | 15 | 2 | 3.42 | -0.34 | -6.30 | 0.76  | -0.70 | 1.02  | 101.91 | -0.68 | -0.30 | 1.28 | -0.97 |
| 61 | 42.00 | 4.54 | 4 | 0 | 7  | 2 | 3.42 | 0.05  | -5.40 | 0.29  | -0.16 | 0.45  | 100.78 | -0.40 | 0.22  | 1.22 | -0.55 |
| 62 | 42.00 | 2.95 | 7 | 0 | 9  | 2 | 3.42 | -0.11 | -4.94 | 0.61  | -0.36 | 0.76  | 92.27  | -0.86 | 0.56  | 0.65 | -0.54 |
| 63 | 41.00 | 3.15 | 6 | 1 | 5  | 1 | 3.42 | 0.48  | -4.49 | 0.38  | 0.02  | 0.66  | 82.92  | -0.38 | 0.62  | 0.89 | -0.27 |
| 64 | 41.00 | 2.85 | 5 | 1 | 4  | 1 | 3.42 | 0.20  | -4.63 | 0.61  | -0.06 | 0.67  | 84.73  | -0.37 | 0.66  | 1.21 | -0.06 |
| 65 | 41.00 | 0.64 | 4 | 1 | 6  | 2 | 3.42 | -0.31 | -5.09 | 0.07  | -0.24 | 0.26  | 91.44  | -0.13 | 0.33  | 1.87 | 0.08  |
| 66 | 42.00 | 4.15 | 4 | 0 | 6  | 2 | 3.42 | -0.44 | -5.21 | -0.11 | 0.08  | 0.24  | 96.55  | -0.43 | 0.53  | 1.51 | -0.33 |
| 67 | 42.00 | 3.69 | 4 | 0 | 6  | 2 | 3.42 | -0.70 | -4.91 | -0.45 | 0.26  | -0.14 | 89.68  | -0.28 | 0.35  | 2.03 | 0.16  |
| 68 | 42.00 | 3.10 | 7 | 0 | 9  | 2 | 3.42 | -0.41 | -5.06 | 0.38  | -0.30 | 0.65  | 94.48  | -0.86 | 0.88  | 0.71 | -0.38 |
| 69 | 41.00 | 3.89 | 6 | 1 | 6  | 2 | 3.42 | 0.21  | -4.95 | 0.27  | -0.08 | 0.58  | 86.97  | -0.43 | 0.64  | 1.31 | -0.11 |
| 70 | 41.00 | 3.43 | 6 | 1 | 6  | 2 | 3.42 | -0.36 | -4.88 | -0.01 | -0.03 | 0.31  | 85.43  | -0.47 | 0.95  | 1.81 | 0.25  |
| 71 | 41.00 | 3.59 | 5 | 1 | 5  | 1 | 3.42 | 0.03  | -4.54 | 0.29  | -0.09 | 0.49  | 85.15  | -0.36 | 0.63  | 1.33 | 0.13  |
| 72 | 41.00 | 1.38 | 4 | 1 | 7  | 2 | 3.42 | -0.76 | -5.57 | -0.17 | -0.35 | 0.19  | 101.84 | -0.24 | 0.31  | 2.55 | 0.11  |
| 73 | 42.00 | 3.93 | 5 | 0 | 7  | 2 | 3.42 | -0.40 | -5.26 | 0.12  | -0.20 | 0.59  | 100.99 | -0.59 | 0.67  | 1.63 | -0.08 |
| 74 | 42.00 | 3.63 | 4 | 0 | 6  | 2 | 3.42 | -0.10 | -4.80 | 0.26  | -0.09 | 0.66  | 96.28  | -0.55 | 0.73  | 1.26 | 0.05  |
| 75 | 51.00 | 8.18 | 4 | 0 | 15 | 2 | 3.42 | -0.62 | -6.81 | 0.16  | -0.57 | 0.66  | 118.58 | -0.59 | 0.06  | 1.79 | -0.96 |
| 76 | 51.00 | 7.72 | 4 | 0 | 15 | 2 | 3.42 | -1.14 | -6.16 | -0.21 | -0.40 | 0.33  | 109.95 | -0.43 | 0.04  | 2.55 | -0.62 |
| 77 | 51.00 | 7.88 | 3 | 0 | 14 | 2 | 3.42 | -0.55 | -6.44 | 0.19  | -0.51 | 0.67  | 114.13 | -0.53 | 0.17  | 1.69 | -0.96 |
| 78 | 41.00 | 3.29 | 6 | 1 | 5  | 1 | 3.42 | 0.25  | -4.70 | 0.12  | 0.03  | 0.54  | 84.52  | -0.37 | 0.93  | 0.97 | -0.18 |
| 79 | 41.00 | 3.52 | 4 | 1 | 6  | 2 | 3.42 | -0.33 | -5.60 | 0.09  | -0.32 | 0.53  | 104.95 | -0.41 | 0.48  | 1.46 | -0.39 |
| 80 | 41.00 | 0.79 | 4 | 1 | 6  | 2 | 3.42 | -0.67 | -5.19 | -0.34 | -0.15 | 0.14  | 93.84  | -0.22 | 0.76  | 2.01 | -0.02 |
| 81 | 42.00 | 2.87 | 5 | 0 | 6  | 2 | 3.42 | -0.76 | -4.21 | -0.22 | 0.17  | 0.17  | 83.89  | -0.25 | 0.85  | 2.30 | 0.49  |
| 82 | 51.00 | 7.58 | 4 | 0 | 14 | 2 | 3.42 | -0.82 | -6.36 | 0.17  | -0.42 | 0.61  | 111.46 | -0.35 | 0.20  | 1.85 | -0.81 |
| 83 | 51.00 | 7.28 | 3 | 0 | 13 | 2 | 3.42 | -0.60 | -6.07 | 0.23  | -0.39 | 0.66  | 108.16 | -0.29 | 0.32  | 1.66 | -0.85 |
| 84 | 42.00 | 3.37 | 7 | 0 | 9  | 2 | 3.42 | -0.49 | -5.41 | 0.41  | -0.40 | 0.54  | 101.31 | -0.53 | 0.17  | 1.28 | -0.66 |
| 85 | 42.00 | 4.42 | 7 | 0 | 11 | 2 | 3.42 | -0.54 | -5.80 | 0.49  | -0.61 | 0.60  | 102.59 | -0.55 | -0.01 | 1.09 | -0.89 |
| 86 | 42.00 | 2.68 | 7 | 0 | 9  | 2 | 0.75 | -1.46 | -4.36 | -0.47 | -0.05 | -0.27 | 82.12  | -0.41 | 0.49  | 2.28 | 0.10  |
| 87 | 42.00 | 2.75 | 5 | 0 | 7  | 2 | 3.42 | -0.32 | -5.76 | 0.69  | -0.44 | 0.52  | 100.21 | -0.24 | 0.11  | 1.05 | -0.57 |
| 88 | 41.00 | 5.51 | 6 | 0 | 13 | 2 | 3.42 | -0.47 | -5.71 | 0.34  | -0.47 | 0.68  | 97.38  | -0.48 | 0.05  | 1.69 | -0.84 |
| 89 | 41.00 | 6.56 | 6 | 0 | 15 | 2 | 3.42 | -0.30 | -6.51 | 0.48  | -0.72 | 0.75  | 100.03 | -0.58 | -0.10 | 1.05 | -1.19 |
| 90 | 41.00 | 4.82 | 6 | 0 | 13 | 2 | 0.75 | -0.96 | -5.37 | -0.37 | -0.24 | -0.07 | 87.38  | -0.26 | 0.40  | 2.20 | -0.20 |
| 91 | 41.00 | 4.88 | 4 | 0 | 11 | 2 | 3.42 | -0.44 | -5.63 | 0.50  | -0.50 | 0.71  | 95.34  | -0.27 | 0.13  | 1.72 | -0.73 |
| 92 | 41.00 | 3.12 | 8 | 0 | 8  | 2 | 3.42 | 0.05  | -5.43 | 0.82  | -0.47 | 0.79  | 99.53  | -0.57 | 0.02  | 0.89 | -0.55 |
| 93 | 41.00 | 4.18 | 8 | 0 | 10 | 2 | 3.42 | 0.01  | -6.06 | 0.93  | -0.65 | 0.91  | 106.99 | -0.64 | -0.09 | 0.91 | -0.83 |
| 94 | 41.00 | 2.43 | 8 | 0 | 8  | 2 | 0.75 | -1.03 | -4.11 | -0.09 | 0.01  | 0.05  | 78.30  | -0.19 | 0.54  | 2.56 | 0.12  |
| 95 | 41.00 | 2.50 | 6 | 0 | 6  | 2 | 3.42 | -0.49 | -5.06 | 0.65  | -0.24 | 0.67  | 84.80  | -0.42 | 0.74  | 1.15 | -0.57 |

Sketched electronic versions of the library compounds were imported into the Tripos Molecular Spreadsheet<sup>1</sup> where in standard Lipinski Rule of 5 parameters (molecular weight, ClogP, number of H-acceptors, and number of H-donors)<sup>2</sup> plus the number of rotatable bonds were computed. Lipinski violations were specified according to molecular weight > 500, ClogP > 5.0, number of acceptors > 10, number of donors > 5, and number of rotatable bonds > 5. The structures were then exported into SDF format and converted into three-dimensional protonated structures via Concord.<sup>3</sup> Absorption, distribution, metabolism and excretion (ADME) profiles of these compounds was then generated via Volsurf.<sup>4</sup> Descriptors were generated using three probes (water, hydrophobic and carbonyl oxygen) with a grid space distribution of 1.0 Å. Predictions were then projected onto internal ADME models at the 5-component level. Finally diversity analysis was carried out using DiverseSolutions<sup>5</sup> using standard H-aware 2D BCUT descriptors. The library was then projected onto a chemical space defined by the following descriptors: `gastchrg_burden_000.100_K_H`, `haccept_burden_001.000_K_H`, `hdonor_burden_000.600_K_H`, `tabpolar_burden_000.400_K_H`, `tabpolar_burden_000.500_K_L` and populated (for comparison) by a recent version of the PubChem library (ca. 11/2006; ~7,000,000 unique chemical structures). Diversity scores ( $div(A)$ ) for our library were then generated for each of our compounds ( $A$ ) according to the expression:

$$div(A) = \frac{pop[Cell(A)]}{\sum_{i \in occ} pop(i) / N_{occ}}$$

where  $N_{occ}$  is the number of cells occupied by PubChem compounds in an evenly distributed 20×20×20×20×20 grid decomposition of the chemistry space, and  $pop(i)$  is the population of cell  $i$ .

---

<sup>1</sup> SYBYL 8.0, The Tripos Associates, St. Louis MO, 2008.

---

<sup>2</sup> Lipinski, C.A., Lombardo, F., Dominy, B.W., Feeney, P.J. Experimental and computational approaches to estimate solubility and permeability in drug discovery and development settings. *Adv. Drug Delivery Rev.* **1997**, **23**, 3-25.

<sup>3</sup> Concord 8.0, The Tripos Associates, St. Louis MO, 2008.

<sup>4</sup> Cruciani, G., Meniconi, M., Carosati, E., Zamora, I., Mannhold, R. VOLSURF: A Tool for Drug ADME-Properties Prediction. In: *Methods and Principles in Medicinal Chemistry*. Eds. van de Waterbeemd, H., Lennernäs, H., Artursson, P. (Wiley-VCH Verlag GmbH & Co., Weinheim, 2003).

<sup>5</sup> Pearlman, R.S.; Smith, K.M. Metric Validation and the Receptor-Relevant Subspace Concept. *J. Chem. Inf. Comput. Sci.* **1999**, **39**, 28-35.
